# Supplementary material
Source: publisher figshare collection journal article supplement (https://acs.figshare.com/ndownloader/files/5894277)
Supplement: Supplementary file 1 [file 5894277]

# om980665y.cif
 
data_ir2pt 
  
_audit_creation_method            SHELXL 
_chemical_name_systematic 
; 
 ? 
; 
_chemical_name_common             ? 
_chemical_formula_moiety          ? 
_chemical_formula_structural      ? 
_chemical_formula_analytical      ? 
_chemical_formula_sum             'C78.25 H66.50 Cl0.50 Ir2 O3 P6 Pt' 
_chemical_formula_weight          1837.85 
_chemical_melting_point           ? 
_chemical_compound_source         ? 
  
loop_ 
 _atom_type_symbol 
 _atom_type_description 
 _atom_type_scat_dispersion_real 
 _atom_type_scat_dispersion_imag 
 _atom_type_scat_source 
 'C'  'C'   0.0033   0.0016 
 'International Tables Vol C Tables 4.2.6.8 and 6.1.1.4' 
 'H'  'H'   0.0000   0.0000 
 'International Tables Vol C Tables 4.2.6.8 and 6.1.1.4' 
 'O'  'O'   0.0106   0.0060 
 'International Tables Vol C Tables 4.2.6.8 and 6.1.1.4' 
 'P'  'P'   0.1023   0.0942 
 'International Tables Vol C Tables 4.2.6.8 and 6.1.1.4' 
 'Cl'  'Cl'   0.1484   0.1585 
 'International Tables Vol C Tables 4.2.6.8 and 6.1.1.4' 
 'Ir'  'Ir'  -1.4442   7.9887 
 'International Tables Vol C Tables 4.2.6.8 and 6.1.1.4' 
 'Pt'  'Pt'  -1.7033   8.3905 
 'International Tables Vol C Tables 4.2.6.8 and 6.1.1.4' 
  
_symmetry_cell_setting            Monoclinic 
_symmetry_space_group_name_H-M    P2(1)/n 
  
loop_ 
 _symmetry_equiv_pos_as_xyz 
 'x, y, z' 
 '-x+1/2, y+1/2, -z+1/2' 
 '-x, -y, -z' 
 'x-1/2, -y-1/2, z-1/2' 
  
_cell_length_a                    12.9054(12) 
_cell_length_b                    17.315(2) 
_cell_length_c                    32.573(3) 
_cell_angle_alpha                 90.00 
_cell_angle_beta                  101.215(6) 
_cell_angle_gamma                 90.00 
_cell_volume                      7139.6(12) 
_cell_formula_units_Z             4 
_cell_measurement_temperature     294(2) 
_cell_measurement_reflns_used     ? 
_cell_measurement_theta_min       ? 
_cell_measurement_theta_max       ? 
  
_exptl_crystal_description        ? 
_exptl_crystal_colour             ? 
_exptl_crystal_size_max           0.11 
_exptl_crystal_size_mid           0.10 
_exptl_crystal_size_min           0.01 
_exptl_crystal_density_meas       ? 
_exptl_crystal_density_diffrn     1.710 
_exptl_crystal_density_method     ? 
_exptl_crystal_F_000              3562 
_exptl_absorpt_coefficient_mu     5.874 
_exptl_absorpt_correction_type    empirical 
_exptl_absorpt_correction_T_min   0.2982 
_exptl_absorpt_correction_T_max   0.4336 
  
_exptl_special_details 
; 
 ? 
; 
  
_diffrn_ambient_temperature       294(2) 
_diffrn_radiation_wavelength      0.71073 
_diffrn_radiation_type            MoK\a 
_diffrn_radiation_source          'fine-focus sealed tube' 
_diffrn_radiation_monochromator   graphite 
_diffrn_measurement_device        'Nonius KappaCCD' 
_diffrn_measurement_method        '\w scans, phi scans' 
_diffrn_standards_number          ? 
_diffrn_standards_interval_count  ? 
_diffrn_standards_interval_time   ? 
_diffrn_standards_decay_%         ? 
_diffrn_reflns_number             20673 
_diffrn_reflns_av_R_equivalents   0.1504 
_diffrn_reflns_av_sigmaI/netI     0.2950 
_diffrn_reflns_limit_h_min        -14 
_diffrn_reflns_limit_h_max        17 
_diffrn_reflns_limit_k_min        -23 
_diffrn_reflns_limit_k_max        13 
_diffrn_reflns_limit_l_min        -41 
_diffrn_reflns_limit_l_max        38 
_diffrn_reflns_theta_min          1.27 
_diffrn_reflns_theta_max          22.50 
_reflns_number_total              9260 
_reflns_number_observed           3590 
_reflns_observed_criterion        >2sigma(I) 
  
_computing_data_collection        'Nonius COLLECT' 
_computing_cell_refinement        'Nonius DENZO' 
_computing_data_reduction         'Nonius SCALEPACK' 
_computing_structure_solution     'SHELXS-86 (Sheldrick, 1990)' 
_computing_structure_refinement   'SHELXL-93 (Sheldrick, 1993)' 
_computing_molecular_graphics     'Siemens SHELXTL' 
_computing_publication_material   'Siemens SHELXTL' 
  
_refine_special_details 
; 
 Refinement on F^2^ for ALL reflections except for 43 with very negative F^2^ 
 or flagged by the user for potential systematic errors.  Weighted R-factors 
 wR and all goodnesses of fit S are based on F^2^, conventional R-factors R 
 are based on F, with F set to zero for negative F^2^. The observed criterion 
 of F^2^ > 2sigma(F^2^) is used only for calculating _R_factor_obs etc. and
is 
 not relevant to the choice of reflections for refinement.  R-factors based 
 on F^2^ are statistically about twice as large as those based on F, and R- 
 factors based on ALL data will be even larger. 
; 
  
_refine_ls_structure_factor_coef  Fsqd 
_refine_ls_matrix_type            full 
_refine_ls_weighting_scheme 
 'calc w=1/[\s^2^(Fo^2^)+(0.0558P)^2^+0.0000P] where P=(Fo^2^+2Fc^2^)/3' 
_atom_sites_solution_primary      direct 
_atom_sites_solution_secondary    difmap 
_atom_sites_solution_hydrogens    geom 
_refine_ls_hydrogen_treatment     ? 
_refine_ls_extinction_method      SHELXL 
_refine_ls_extinction_coef        0.00000(3) 
_refine_ls_extinction_expression 
 'Fc^*^=kFc[1+0.001xFc^2^\l^3^/sin(2\q)]^-1/4^' 
_refine_ls_number_reflns          9217 
_refine_ls_number_parameters      583 
_refine_ls_number_restraints      0 
_refine_ls_R_factor_all           0.2179 
_refine_ls_R_factor_obs           0.0692 
_refine_ls_wR_factor_all          0.2144 
_refine_ls_wR_factor_obs          0.1330 
_refine_ls_goodness_of_fit_all    0.935 
_refine_ls_goodness_of_fit_obs    1.134 
_refine_ls_restrained_S_all       1.088 
_refine_ls_restrained_S_obs       1.134 
_refine_ls_shift/esd_max          -3.899 
_refine_ls_shift/esd_mean         0.062 
  
loop_ 
 _atom_site_label 
 _atom_site_type_symbol 
 _atom_site_fract_x 
 _atom_site_fract_y 
 _atom_site_fract_z 
 _atom_site_U_iso_or_equiv 
 _atom_site_thermal_displace_type 
 _atom_site_occupancy 
 _atom_site_calc_flag 
 _atom_site_refinement_flags 
 _atom_site_disorder_group 
Pt1 Pt 0.39477(9) 0.64833(6) 0.63009(3) 0.0418(4) Uani 1 d . . 
Ir1 Ir 0.45262(9) 0.77981(6) 0.59820(3) 0.0410(4) Uani 1 d . . 
Ir2 Ir 0.56827(8) 0.71836(6) 0.66752(3) 0.0389(3) Uani 1 d . . 
P1 P 0.2406(6) 0.6428(4) 0.5850(2) 0.053(2) Uani 1 d . . 
P2 P 0.2892(6) 0.8071(4) 0.5593(2) 0.054(2) Uani 1 d . . 
P3 P 0.5455(6) 0.8926(4) 0.6075(2) 0.048(2) Uani 1 d . . 
P4 P 0.6668(6) 0.8264(4) 0.6908(2) 0.045(2) Uani 1 d . . 
P5 P 0.5843(6) 0.6404(4) 0.7253(2) 0.044(2) Uani 1 d . . 
P6 P 0.4127(6) 0.5436(4) 0.6724(2) 0.052(2) Uani 1 d . . 
O1 O 0.7032(14) 0.6149(10) 0.6239(6) 0.075(6) Uani 1 d . . 
O2 O 0.3716(12) 0.8147(9) 0.6783(5) 0.050(5) Uani 1 d . . 
O3 O 0.5409(17) 0.6930(12) 0.5309(6) 0.108(8) Uani 1 d . . 
C1 C 0.4357(20) 0.7863(14) 0.6590(7) 0.042(7) Uiso 1 d . . 
C2 C 0.6522(21) 0.6540(15) 0.6394(8) 0.051(8) Uiso 1 d . . 
C3 C 0.5156(21) 0.7241(15) 0.5579(8) 0.051(8) Uiso 1 d . . 
C4 C 0.1907(20) 0.7445(13) 0.5732(7) 0.060(8) Uiso 1 d . . 
H4A H 0.1300(20) 0.7432(13) 0.5504(7) 0.072 Uiso 1 calc R . 
H4B H 0.1678(20) 0.7653(13) 0.5976(7) 0.072 Uiso 1 calc R . 
C5 C 0.5983(18) 0.9088(13) 0.6643(6) 0.045(7) Uiso 1 d . . 
H5A H 0.6465(18) 0.9524(13) 0.6673(6) 0.054 Uiso 1 calc R . 
H5B H 0.5402(18) 0.9223(13) 0.6778(6) 0.054 Uiso 1 calc R . 
C6 C 0.5463(18) 0.5431(12) 0.7082(7) 0.047(7) Uiso 1 d . . 
H6A H 0.5439(18) 0.5108(12) 0.7323(7) 0.056 Uiso 1 calc R . 
H6B H 0.5983(18) 0.5216(12) 0.6935(7) 0.056 Uiso 1 calc R . 
C11 C 0.1276(22) 0.5927(17) 0.6033(8) 0.075(10) Uani 1 d G . 
C12 C 0.1354(29) 0.5135(17) 0.6101(11) 0.102(12) Uiso 1 d G . 
H12A H 0.1890(104) 0.4834(32) 0.6029(77) 0.123 Uiso 1 calc R . 
C13 C 0.0544(26) 0.4831(18) 0.6287(9) 0.092(11) Uiso 1 d G . 
H13A H 0.0627(26) 0.4323(18) 0.6380(9) 0.111 Uiso 1 calc R . 
C14 C -0.0327(27) 0.5191(19) 0.6346(9) 0.098(11) Uiso 1 d G . 
H14A H -0.0867(27) 0.4929(19) 0.6438(9) 0.118 Uiso 1 calc R . 
C15 C -0.0387(26) 0.5955(19) 0.6264(9) 0.094(11) Uiso 1 d G . 
H15A H -0.0971(26) 0.6224(19) 0.6317(9) 0.113 Uiso 1 calc R . 
C16 C 0.0415(25) 0.6387(19) 0.6095(8) 0.084(10) Uiso 1 d G . 
H16A H 0.0362(25) 0.6912(19) 0.6034(8) 0.100 Uiso 1 calc R . 
C21 C 0.2380(22) 0.5971(14) 0.5349(8) 0.053(8) Uiso 1 d G . 
C22 C 0.1428(23) 0.5843(22) 0.5075(10) 0.113(13) Uiso 1 d G . 
H22A H 0.0798(42) 0.6005(147) 0.5145(16) 0.136 Uiso 1 calc R . 
C23 C 0.1413(35) 0.5450(22) 0.4671(13) 0.164(18) Uiso 1 d G . 
H23A H 0.0801(35) 0.5365(22) 0.4473(13) 0.196 Uiso 1 calc R . 
C24 C 0.2427(33) 0.5215(19) 0.4618(11) 0.119(14) Uiso 1 d G . 
H24A H 0.2477(33) 0.4985(19) 0.4364(11) 0.143 Uiso 1 calc R . 
C25 C 0.3338(29) 0.5298(19) 0.4906(11) 0.111(13) Uiso 1 d G . 
H25A H 0.3971(29) 0.5102(19) 0.4854(11) 0.133 Uiso 1 calc R . 
C26 C 0.3309(24) 0.5670(15) 0.5268(9) 0.076(10) Uiso 1 d G . 
H26A H 0.3929(24) 0.5725(15) 0.5466(9) 0.091 Uiso 1 calc R . 
C31 C 0.2728(19) 0.8020(13) 0.5021(7) 0.041(7) Uiso 1 d G . 
C32 C 0.1771(20) 0.7783(18) 0.4780(8) 0.076(9) Uiso 1 d G . 
H32A H 0.1223(41) 0.7622(114) 0.4908(24) 0.091 Uiso 1 calc R . 
C33 C 0.1638(28) 0.7791(18) 0.4332(10) 0.111(12) Uiso 1 d G . 
H33A H 0.0983(28) 0.7693(18) 0.4163(10) 0.133 Uiso 1 calc R . 
C34 C 0.2498(28) 0.7944(17) 0.4162(10) 0.099(12) Uiso 1 d G . 
H34A H 0.2421(28) 0.7912(17) 0.3872(10) 0.119 Uiso 1 calc R . 
C35 C 0.3438(23) 0.8137(14) 0.4381(8) 0.061(9) Uiso 1 d G . 
H35A H 0.4007(23) 0.8242(14) 0.4253(8) 0.073 Uiso 1 calc R . 
C36 C 0.3532(21) 0.8175(13) 0.4822(7) 0.053(8) Uiso 1 d G . 
H36A H 0.4182(21) 0.8313(13) 0.4983(7) 0.063 Uiso 1 calc R . 
C41 C 0.2224(20) 0.8985(14) 0.5658(7) 0.055(8) Uiso 1 d G . 
C42 C 0.1693(22) 0.9421(15) 0.5324(8) 0.066(9) Uiso 1 d G . 
H42A H 0.1646(142) 0.9263(47) 0.5049(12) 0.080 Uiso 1 calc R . 
C43 C 0.1224(22) 1.0121(16) 0.5425(9) 0.077(10) Uiso 1 d G . 
H43A H 0.0902(22) 1.0438(16) 0.5206(9) 0.092 Uiso 1 calc R . 
C44 C 0.1222(21) 1.0352(16) 0.5822(8) 0.068(9) Uiso 1 d G . 
H44A H 0.0930(21) 1.0823(16) 0.5878(8) 0.082 Uiso 1 calc R . 
C45 C 0.1679(22) 0.9853(16) 0.6146(9) 0.072(9) Uiso 1 d G . 
H45A H 0.1631(22) 0.9969(16) 0.6420(9) 0.087 Uiso 1 calc R . 
C46 C 0.2190(20) 0.9201(15) 0.6065(8) 0.057(8) Uiso 1 d G . 
H46A H 0.2522(20) 0.8895(15) 0.6286(8) 0.068 Uiso 1 calc R . 
C51 C 0.4817(19) 0.9850(14) 0.5922(7) 0.047(8) Uiso 1 d G . 
C52 C 0.4502(25) 1.0012(18) 0.5498(7) 0.090(11) Uiso 1 d G . 
H52A H 0.4667(169) 0.9652(58) 0.5309(8) 0.108 Uiso 1 calc R . 
C53 C 0.3924(23) 1.0713(17) 0.5327(9) 0.086(10) Uiso 1 d G . 
H53A H 0.3745(23) 1.0827(17) 0.5043(9) 0.103 Uiso 1 calc R . 
C54 C 0.3702(21) 1.1137(16) 0.5612(8) 0.071(9) Uiso 1 d G . 
H54A H 0.3310(21) 1.1574(16) 0.5516(8) 0.085 Uiso 1 calc R . 
C55 C 0.3937(22) 1.1065(16) 0.6034(9) 0.075(10) Uiso 1 d G . 
H55A H 0.3753(22) 1.1440(16) 0.6212(9) 0.090 Uiso 1 calc R . 
C56 C 0.4497(22) 1.0363(16) 0.6192(9) 0.078(10) Uiso 1 d G . 
H56A H 0.4639(22) 1.0263(16) 0.6478(9) 0.094 Uiso 1 calc R . 
C61 C 0.6687(20) 0.9043(14) 0.5891(7) 0.051(8) Uiso 1 d G . 
C62 C 0.7135(23) 0.9760(14) 0.5845(9) 0.074(10) Uiso 1 d G . 
H62A H 0.6752(131) 1.0201(27) 0.5881(52) 0.089 Uiso 1 calc R . 
C63 C 0.8097(25) 0.9846(18) 0.5749(8) 0.089(11) Uiso 1 d G . 
H63A H 0.8386(25) 1.0335(18) 0.5733(8) 0.107 Uiso 1 calc R . 
C64 C 0.8629(24) 0.9212(17) 0.5678(8) 0.075(10) Uiso 1 d G . 
H64A H 0.9291(24) 0.9259(17) 0.5607(8) 0.090 Uiso 1 calc R . 
C65 C 0.8197(26) 0.8480(19) 0.5709(9) 0.102(11) Uiso 1 d G . 
H65A H 0.8576(26) 0.8039(19) 0.5668(9) 0.123 Uiso 1 calc R . 
C66 C 0.7186(21) 0.8417(15) 0.5802(7) 0.054(8) Uiso 1 d G . 
H66A H 0.6866(21) 0.7936(15) 0.5802(7) 0.064 Uiso 1 calc R . 
C71 C 0.6776(19) 0.8563(14) 0.7451(7) 0.056(8) Uiso 1 d G . 
C72 C 0.7759(20) 0.8646(16) 0.7712(7) 0.062(9) Uiso 1 d G . 
H72A H 0.8378(19) 0.8633(110) 0.7605(18) 0.074 Uiso 1 calc R . 
C73 C 0.7786(26) 0.8751(16) 0.8149(10) 0.097(11) Uiso 1 d G . 
H73A H 0.8427(26) 0.8837(16) 0.8330(10) 0.116 Uiso 1 calc R . 
C74 C 0.6895(26) 0.8727(15) 0.8300(9) 0.082(10) Uiso 1 d G . 
H74A H 0.6929(26) 0.8777(15) 0.8586(9) 0.099 Uiso 1 calc R . 
C75 C 0.5941(25) 0.8631(15) 0.8044(9) 0.079(10) Uiso 1 d G . 
H75A H 0.5338(25) 0.8617(15) 0.8161(9) 0.095 Uiso 1 calc R . 
C76 C 0.5833(22) 0.8551(14) 0.7611(8) 0.068(9) Uiso 1 d G . 
H76A H 0.5175(22) 0.8494(14) 0.7436(8) 0.082 Uiso 1 calc R . 
C81 C 0.8059(17) 0.8338(11) 0.6847(6) 0.029(6) Uiso 1 d G . 
C82 C 0.8574(20) 0.9018(13) 0.6781(9) 0.061(8) Uiso 1 d G . 
H82A H 0.8195(85) 0.9479(11) 0.6743(58) 0.073 Uiso 1 calc R . 
C83 C 0.9599(24) 0.9021(17) 0.6771(8) 0.076(10) Uiso 1 d G . 
H83A H 0.9936(24) 0.9490(17) 0.6750(8) 0.091 Uiso 1 calc R . 
C84 C 1.0161(25) 0.8364(18) 0.6790(8) 0.086(10) Uiso 1 d G . 
H84A H 1.0853(25) 0.8371(18) 0.6748(8) 0.103 Uiso 1 calc R . 
C85 C 0.9702(24) 0.7690(17) 0.6870(8) 0.075(9) Uiso 1 d G . 
H85A H 1.0117(24) 0.7247(17) 0.6913(8) 0.090 Uiso 1 calc R . 
C86 C 0.8640(22) 0.7633(15) 0.6892(7) 0.062(8) Uiso 1 d G . 
H86A H 0.8327(22) 0.7163(15) 0.6934(7) 0.074 Uiso 1 calc R . 
C91 C 0.7192(21) 0.6245(14) 0.7509(8) 0.059(8) Uiso 1 d G . 
C92 C 0.7900(22) 0.5733(16) 0.7383(9) 0.073(9) Uiso 1 d G . 
H92A H 0.7637(72) 0.5368(87) 0.7181(31) 0.087 Uiso 1 calc R . 
C93 C 0.8948(26) 0.5738(17) 0.7539(9) 0.085(10) Uiso 1 d G . 
H93A H 0.9386(26) 0.5398(17) 0.7432(9) 0.102 Uiso 1 calc R . 
C94 C 0.9397(25) 0.6257(15) 0.7868(8) 0.076(10) Uiso 1 d G . 
H94A H 1.0123(25) 0.6294(15) 0.7964(8) 0.091 Uiso 1 calc R . 
C95 C 0.8713(26) 0.6688(17) 0.8031(9) 0.086(10) Uiso 1 d G . 
H95A H 0.8954(26) 0.6980(17) 0.8271(9) 0.103 Uiso 1 calc R . 
C96 C 0.7657(22) 0.6703(14) 0.7848(8) 0.053(8) Uiso 1 d G . 
H96A H 0.7222(22) 0.7042(14) 0.7958(8) 0.064 Uiso 1 calc R . 
C101 C 0.5107(19) 0.6560(13) 0.7655(6) 0.041(7) Uiso 1 d G . 
C102 C 0.5395(21) 0.6193(14) 0.8040(7) 0.061(9) Uiso 1 d G . 
H10A H 0.5958(61) 0.5849(104) 0.8074(30) 0.073 Uiso 1 calc R . 
C103 C 0.4887(25) 0.6308(17) 0.8385(10) 0.090(11) Uiso 1 d G . 
H10B H 0.5146(25) 0.6099(17) 0.8648(10) 0.108 Uiso 1 calc R . 
C104 C 0.3990(25) 0.6749(17) 0.8304(9) 0.087(11) Uiso 1 d G . 
H10C H 0.3577(25) 0.6780(17) 0.8507(9) 0.104 Uiso 1 calc R . 
C105 C 0.3664(24) 0.7157(16) 0.7928(9) 0.084(10) Uiso 1 d G . 
H10D H 0.3093(24) 0.7495(16) 0.7894(9) 0.101 Uiso 1 calc R . 
C106 C 0.4241(21) 0.7034(14) 0.7600(8) 0.063(9) Uiso 1 d G . 
H10E H 0.4023(21) 0.7281(14) 0.7344(8) 0.075 Uiso 1 calc R . 
C111 C 0.3178(21) 0.5272(14) 0.7068(7) 0.055(8) Uiso 1 d G . 
C112 C 0.3348(25) 0.4665(15) 0.7352(9) 0.080(10) Uiso 1 d G . 
H11A H 0.3913(87) 0.4325(82) 0.7374(51) 0.096 Uiso 1 calc R . 
C113 C 0.2575(30) 0.4616(20) 0.7607(11) 0.125(14) Uiso 1 d G . 
H11B H 0.2665(30) 0.4219(20) 0.7803(11) 0.150 Uiso 1 calc R . 
C114 C 0.1733(27) 0.5069(18) 0.7599(9) 0.096(11) Uiso 1 d G . 
H11C H 0.1227(27) 0.4976(18) 0.7762(9) 0.115 Uiso 1 calc R . 
C115 C 0.1681(24) 0.5679(17) 0.7333(9) 0.086(10) Uiso 1 d G . 
H11D H 0.1153(24) 0.6046(17) 0.7330(9) 0.104 Uiso 1 calc R . 
C116 C 0.2366(23) 0.5768(16) 0.7076(8) 0.075(10) Uiso 1 d G . 
H11E H 0.2282(23) 0.6188(16) 0.6895(8) 0.090 Uiso 1 calc R . 
C121 C 0.4226(21) 0.4549(14) 0.6438(8) 0.058(8) Uiso 1 d G . 
C122 C 0.3638(26) 0.3898(16) 0.6493(10) 0.097(11) Uiso 1 d G . 
H12B H 0.3146(151) 0.3894(59) 0.6667(48) 0.116 Uiso 1 calc R . 
C123 C 0.3857(30) 0.3221(22) 0.6256(11) 0.142(15) Uiso 1 d G . 
H12C H 0.3566(30) 0.2750(22) 0.6311(11) 0.170 Uiso 1 calc R . 
C124 C 0.4479(26) 0.3245(19) 0.5952(10) 0.102(12) Uiso 1 d G . 
H12D H 0.4535(26) 0.2811(19) 0.5790(10) 0.123 Uiso 1 calc R . 
C125 C 0.4971(24) 0.3861(17) 0.5896(9) 0.083(10) Uiso 1 d G . 
H12E H 0.5405(24) 0.3872(17) 0.5699(9) 0.099 Uiso 1 calc R . 
C126 C 0.4848(22) 0.4565(15) 0.6145(8) 0.068(9) Uiso 1 d G . 
H12F H 0.5198(22) 0.5017(15) 0.6100(8) 0.082 Uiso 1 calc R . 
C100 C -0.1209(58) 0.7076(41) 0.4552(21) 0.000(20) Uiso 0.25 d P . 
H10F H -0.1542(58) 0.7573(41) 0.4481(21) 0.000 Uiso 0.25 calc PR . 
H10G H -0.0501(58) 0.7205(41) 0.4698(21) 0.000 Uiso 0.25 calc PR . 
Cl1 Cl -0.1098(25) 0.6969(17) 0.4352(10) 0.062(10) Uiso 0.25 d P . 
Cl2 Cl -0.1860(29) 0.6796(19) 0.5035(10) 0.100(12) Uiso 0.25 d P . 
  
loop_ 
 _atom_site_aniso_label 
 _atom_site_aniso_U_11 
 _atom_site_aniso_U_22 
 _atom_site_aniso_U_33 
 _atom_site_aniso_U_23 
 _atom_site_aniso_U_13 
 _atom_site_aniso_U_12 
Pt1 0.0425(8) 0.0369(7) 0.0455(7) 0.0012(6) 0.0072(6) -0.0038(7) 
Ir1 0.0471(9) 0.0397(7) 0.0364(7) 0.0006(6) 0.0089(6) -0.0034(7) 
Ir2 0.0417(8) 0.0372(7) 0.0376(7) -0.0002(6) 0.0076(6) -0.0025(7) 
P1 0.047(6) 0.048(5) 0.063(5) 0.002(4) 0.010(5) -0.013(5) 
P2 0.049(6) 0.079(6) 0.031(4) 0.006(4) 0.002(4) -0.002(5) 
P3 0.063(6) 0.040(5) 0.040(5) 0.001(4) 0.009(5) -0.002(4) 
P4 0.057(6) 0.030(5) 0.048(5) 0.003(4) 0.009(4) -0.003(4) 
P5 0.036(5) 0.051(5) 0.041(4) 0.003(4) -0.002(4) -0.002(4) 
P6 0.048(6) 0.049(5) 0.058(5) 0.004(4) 0.011(5) -0.005(4) 
O1 0.050(15) 0.072(15) 0.102(16) -0.020(12) 0.010(13) 0.032(12) 
O2 0.042(13) 0.056(12) 0.057(12) 0.008(9) 0.024(11) 0.018(10) 
O3 0.105(20) 0.143(22) 0.083(16) -0.028(15) 0.037(15) 0.028(16) 
C11 0.044(23) 0.081(26) 0.081(23) -0.001(20) -0.032(19) -0.002(20) 
  
_geom_special_details 
; 
 All esds (except the esd in the dihedral angle between two l.s. planes) 
 are estimated using the full covariance matrix.  The cell esds are taken 
 into account individually in the estimation of esds in distances, angles 
 and torsion angles; correlations between esds in cell parameters are only 
 used when they are defined by crystal symmetry.  An approximate (isotropic) 
 treatment of cell esds is used for estimating esds involving l.s. planes. 
; 
  
loop_ 
 _geom_bond_atom_site_label_1 
 _geom_bond_atom_site_label_2 
 _geom_bond_distance 
 _geom_bond_site_symmetry_2 
 _geom_bond_publ_flag 
Pt1 P1 2.233(8) . ? 
Pt1 P6 2.262(7) . ? 
Pt1 C1 2.58(2) . ? 
Pt1 Ir2 2.628(2) . ? 
Pt1 Ir1 2.6685(15) . ? 
Ir1 C3 1.93(3) . ? 
Ir1 C1 2.04(2) . ? 
Ir1 P3 2.281(7) . ? 
Ir1 P2 2.289(8) . ? 
Ir1 Ir2 2.6733(15) . ? 
Ir2 C2 1.91(3) . ? 
Ir2 C1 2.05(3) . ? 
Ir2 P5 2.292(7) . ? 
Ir2 P4 2.306(7) . ? 
P1 C21 1.81(2) . ? 
P1 C4 1.89(2) . ? 
P1 C11 1.89(3) . ? 
P2 C4 1.79(2) . ? 
P2 C41 1.83(2) . ? 
P2 C31 1.84(2) . ? 
P3 C61 1.82(2) . ? 
P3 C51 1.82(2) . ? 
P3 C5 1.86(2) . ? 
P4 C5 1.81(2) . ? 
P4 C71 1.82(2) . ? 
P4 C81 1.85(2) . ? 
P5 C6 1.81(2) . ? 
P5 C101 1.78(2) . ? 
P5 C91 1.80(3) . ? 
P6 C111 1.84(2) . ? 
P6 C121 1.81(2) . ? 
P6 C6 1.88(2) . ? 
O1 C2 1.13(2) . ? 
O2 C1 1.24(2) . ? 
O3 C3 1.13(2) . ? 
C11 C12 1.39 . ? 
C11 C16 1.41(3) . ? 
C12 C13 1.41(3) . ? 
C13 C14 1.33(4) . ? 
C14 C15 1.35(3) . ? 
C15 C16 1.47(3) . ? 
C21 C22 1.39 . ? 
C21 C26 1.38(3) . ? 
C22 C23 1.48(4) . ? 
C23 C24 1.41(4) . ? 
C24 C25 1.36(4) . ? 
C25 C26 1.35(3) . ? 
C31 C32 1.39 . ? 
C31 C36 1.35(3) . ? 
C32 C33 1.44(3) . ? 
C33 C34 1.36(4) . ? 
C34 C35 1.33(4) . ? 
C35 C36 1.42(3) . ? 
C41 C42 1.39 . ? 
C41 C46 1.38(3) . ? 
C42 C43 1.42(3) . ? 
C43 C44 1.36(3) . ? 
C44 C45 1.40(3) . ? 
C45 C46 1.36(3) . ? 
C51 C52 1.39 . ? 
C51 C56 1.37(3) . ? 
C52 C53 1.48(3) . ? 
C53 C54 1.26(3) . ? 
C54 C55 1.36(3) . ? 
C55 C56 1.46(3) . ? 
C61 C62 1.39 . ? 
C61 C66 1.32(3) . ? 
C62 C63 1.35(3) . ? 
C63 C64 1.34(3) . ? 
C64 C65 1.40(3) . ? 
C65 C66 1.40(3) . ? 
C71 C72 1.39 . ? 
C71 C76 1.41(3) . ? 
C72 C73 1.43(3) . ? 
C73 C74 1.34(3) . ? 
C74 C75 1.36(3) . ? 
C75 C76 1.40(3) . ? 
C81 C82 1.39 . ? 
C81 C86 1.43(3) . ? 
C82 C83 1.33(3) . ? 
C83 C84 1.34(3) . ? 
C84 C85 1.36(3) . ? 
C85 C86 1.39(3) . ? 
C91 C92 1.39 . ? 
C91 C96 1.40(3) . ? 
C92 C93 1.35(3) . ? 
C93 C94 1.43(3) . ? 
C94 C95 1.34(3) . ? 
C95 C96 1.38(3) . ? 
C101 C102 1.39 . ? 
C101 C106 1.37(3) . ? 
C102 C103 1.42(3) . ? 
C103 C104 1.37(3) . ? 
C104 C105 1.40(3) . ? 
C105 C106 1.43(3) . ? 
C111 C112 1.39 . ? 
C111 C116 1.36(3) . ? 
C112 C113 1.42(3) . ? 
C113 C114 1.34(4) . ? 
C114 C115 1.36(3) . ? 
C115 C116 1.34(3) . ? 
C121 C122 1.39 . ? 
C121 C126 1.36(3) . ? 
C122 C123 1.46(4) . ? 
C123 C124 1.39(4) . ? 
C124 C125 1.27(3) . ? 
C125 C126 1.49(3) . ? 
C100 Cl1 0.72(6) . ? 
C100 Cl2 1.98(7) . ? 
  
loop_ 
 _geom_angle_atom_site_label_1 
 _geom_angle_atom_site_label_2 
 _geom_angle_atom_site_label_3 
 _geom_angle 
 _geom_angle_site_symmetry_1 
 _geom_angle_site_symmetry_3 
 _geom_angle_publ_flag 
P1 Pt1 P6 109.8(3) . . ? 
P1 Pt1 C1 111.8(6) . . ? 
P6 Pt1 C1 122.0(5) . . ? 
P1 Pt1 Ir2 153.4(2) . . ? 
P6 Pt1 Ir2 96.3(2) . . ? 
C1 Pt1 Ir2 46.3(6) . . ? 
P1 Pt1 Ir1 93.5(2) . . ? 
P6 Pt1 Ir1 156.6(2) . . ? 
C1 Pt1 Ir1 45.6(5) . . ? 
Ir2 Pt1 Ir1 60.62(4) . . ? 
C3 Ir1 C1 145.8(10) . . ? 
C3 Ir1 P3 103.8(8) . . ? 
C1 Ir1 P3 88.6(7) . . ? 
C3 Ir1 P2 101.1(8) . . ? 
C1 Ir1 P2 105.4(7) . . ? 
P3 Ir1 P2 107.5(3) . . ? 
C3 Ir1 Pt1 91.4(7) . . ? 
C1 Ir1 Pt1 65.0(7) . . ? 
P3 Ir1 Pt1 149.1(2) . . ? 
P2 Ir1 Pt1 95.4(2) . . ? 
C3 Ir1 Ir2 97.8(8) . . ? 
C1 Ir1 Ir2 49.4(7) . . ? 
P3 Ir1 Ir2 92.1(2) . . ? 
P2 Ir1 Ir2 148.5(2) . . ? 
Pt1 Ir1 Ir2 58.95(4) . . ? 
C2 Ir2 C1 143.8(10) . . ? 
C2 Ir2 P5 94.6(8) . . ? 
C1 Ir2 P5 112.9(7) . . ? 
C2 Ir2 P4 107.7(8) . . ? 
C1 Ir2 P4 88.4(7) . . ? 
P5 Ir2 P4 104.6(2) . . ? 
C2 Ir2 Pt1 91.1(8) . . ? 
C1 Ir2 Pt1 65.7(7) . . ? 
P5 Ir2 Pt1 92.4(2) . . ? 
P4 Ir2 Pt1 153.2(2) . . ? 
C2 Ir2 Ir1 95.9(8) . . ? 
C1 Ir2 Ir1 48.9(6) . . ? 
P5 Ir2 Ir1 150.9(2) . . ? 
P4 Ir2 Ir1 97.8(2) . . ? 
Pt1 Ir2 Ir1 60.43(4) . . ? 
C21 P1 C4 106.3(11) . . ? 
C21 P1 C11 101.7(12) . . ? 
C4 P1 C11 103.8(12) . . ? 
C21 P1 Pt1 118.0(10) . . ? 
C4 P1 Pt1 108.6(9) . . ? 
C11 P1 Pt1 117.1(9) . . ? 
C4 P2 C41 96.9(11) . . ? 
C4 P2 C31 106.2(12) . . ? 
C41 P2 C31 101.3(11) . . ? 
C4 P2 Ir1 110.9(9) . . ? 
C41 P2 Ir1 121.2(9) . . ? 
C31 P2 Ir1 117.6(8) . . ? 
C61 P3 C51 100.9(11) . . ? 
C61 P3 C5 97.8(11) . . ? 
C51 P3 C5 101.4(10) . . ? 
C61 P3 Ir1 121.5(8) . . ? 
C51 P3 Ir1 121.1(9) . . ? 
C5 P3 Ir1 110.0(8) . . ? 
C5 P4 C71 100.2(11) . . ? 
C5 P4 C81 106.8(10) . . ? 
C71 P4 C81 101.1(11) . . ? 
C5 P4 Ir2 107.2(8) . . ? 
C71 P4 Ir2 118.8(9) . . ? 
C81 P4 Ir2 120.4(7) . . ? 
C6 P5 C101 102.5(11) . . ? 
C6 P5 C91 100.3(12) . . ? 
C101 P5 C91 106.8(11) . . ? 
C6 P5 Ir2 108.6(8) . . ? 
C101 P5 Ir2 122.6(8) . . ? 
C91 P5 Ir2 113.3(8) . . ? 
C111 P6 C121 107.7(12) . . ? 
C111 P6 C6 105.1(11) . . ? 
C121 P6 C6 99.6(11) . . ? 
C111 P6 Pt1 119.6(8) . . ? 
C121 P6 Pt1 112.1(8) . . ? 
C6 P6 Pt1 110.7(8) . . ? 
O2 C1 Ir1 136.6(19) . . ? 
O2 C1 Ir2 141.6(18) . . ? 
Ir1 C1 Ir2 81.7(9) . . ? 
O2 C1 Pt1 116.4(17) . . ? 
Ir1 C1 Pt1 69.4(7) . . ? 
Ir2 C1 Pt1 68.0(7) . . ? 
O1 C2 Ir2 178.0(24) . . ? 
O3 C3 Ir1 171.3(25) . . ? 
P2 C4 P1 112.6(13) . . ? 
P4 C5 P3 113.9(12) . . ? 
P5 C6 P6 110.3(12) . . ? 
C12 C11 C16 124.6(31) . . ? 
C12 C11 P1 117.8(24) . . ? 
C16 C11 P1 117.5(22) . . ? 
C11 C12 C13 113.6(30) . . ? 
C14 C13 C12 127.2(33) . . ? 
C15 C14 C13 116.7(34) . . ? 
C14 C15 C16 123.8(33) . . ? 
C15 C16 C11 113.4(29) . . ? 
C22 C21 C26 120.6(28) . . ? 
C22 C21 P1 120.6(23) . . ? 
C26 C21 P1 118.4(23) . . ? 
C23 C22 C21 120.2(32) . . ? 
C24 C23 C22 113.0(38) . . ? 
C23 C24 C25 125.5(39) . . ? 
C26 C25 C24 119.0(36) . . ? 
C25 C26 C21 121.4(32) . . ? 
C32 C31 C36 117.9(23) . . ? 
C32 C31 P2 120.2(19) . . ? 
C36 C31 P2 121.9(19) . . ? 
C31 C32 C33 119.3(26) . . ? 
C34 C33 C32 118.1(34) . . ? 
C35 C34 C33 124.3(34) . . ? 
C36 C35 C34 116.5(27) . . ? 
C35 C36 C31 123.6(26) . . ? 
C42 C41 C46 119.9(24) . . ? 
C42 C41 P2 123.3(20) . . ? 
C46 C41 P2 116.5(18) . . ? 
C43 C42 C41 116.8(25) . . ? 
C44 C43 C42 123.5(28) . . ? 
C45 C44 C43 117.2(28) . . ? 
C46 C45 C44 121.0(26) . . ? 
C45 C46 C41 121.1(26) . . ? 
C52 C51 C56 116.1(26) . . ? 
C52 C51 P3 118.6(21) . . ? 
C56 C51 P3 124.8(20) . . ? 
C51 C52 C53 124.8(27) . . ? 
C54 C53 C52 111.7(29) . . ? 
C55 C54 C53 131.0(33) . . ? 
C56 C55 C54 115.6(28) . . ? 
C55 C56 C51 120.5(27) . . ? 
C62 C61 C66 118.6(25) . . ? 
C62 C61 P3 123.0(21) . . ? 
C66 C61 P3 118.4(19) . . ? 
C61 C62 C63 123.1(28) . . ? 
C64 C63 C62 118.5(31) . . ? 
C65 C64 C63 120.4(31) . . ? 
C64 C65 C66 119.2(31) . . ? 
C65 C66 C61 119.9(28) . . ? 
C72 C71 C76 121.9(24) . . ? 
C72 C71 P4 120.6(19) . . ? 
C76 C71 P4 116.4(20) . . ? 
C71 C72 C73 117.5(25) . . ? 
C72 C73 C74 120.4(32) . . ? 
C75 C74 C73 121.5(31) . . ? 
C74 C75 C76 122.2(30) . . ? 
C75 C76 C71 116.4(28) . . ? 
C82 C81 C86 119.0(23) . . ? 
C82 C81 P4 125.4(18) . . ? 
C86 C81 P4 115.6(17) . . ? 
C81 C82 C83 121.0(26) . . ? 
C84 C83 C82 121.7(31) . . ? 
C85 C84 C83 119.0(32) . . ? 
C84 C85 C86 122.8(30) . . ? 
C85 C86 C81 116.0(25) . . ? 
C92 C91 C96 112.9(26) . . ? 
C92 C91 P5 126.4(23) . . ? 
C96 C91 P5 120.5(20) . . ? 
C91 C92 C93 123.7(29) . . ? 
C94 C93 C92 121.0(30) . . ? 
C93 C94 C95 116.3(32) . . ? 
C96 C95 C94 120.7(31) . . ? 
C95 C96 C91 124.6(27) . . ? 
C102 C101 C106 117.4(22) . . ? 
C102 C101 P5 120.5(18) . . ? 
C106 C101 P5 122.2(17) . . ? 
C103 C102 C101 124.4(24) . . ? 
C102 C103 C104 115.4(29) . . ? 
C105 C104 C103 123.2(31) . . ? 
C106 C105 C104 117.6(29) . . ? 
C105 C106 C101 121.4(25) . . ? 
C112 C111 C116 119.1(25) . . ? 
C112 C111 P6 119.1(21) . . ? 
C116 C111 P6 121.6(20) . . ? 
C111 C112 C113 113.5(27) . . ? 
C114 C113 C112 128.0(35) . . ? 
C113 C114 C115 114.0(33) . . ? 
C116 C115 C114 122.1(32) . . ? 
C115 C116 C111 123.0(29) . . ? 
C122 C121 C126 121.1(26) . . ? 
C122 C121 P6 121.8(21) . . ? 
C126 C121 P6 117.0(20) . . ? 
C123 C122 C121 114.6(29) . . ? 
C122 C123 C124 123.3(34) . . ? 
C125 C124 C123 120.1(35) . . ? 
C124 C125 C126 119.9(30) . . ? 
C125 C126 C121 120.4(26) . . ? 
Cl1 C100 Cl2 147.9(88) . . ? 
  
_refine_diff_density_max    1.845 
_refine_diff_density_min   -1.042 
_refine_diff_density_rms    0.237 
 
data_ptir 
  
_audit_creation_method            SHELXL 
_chemical_name_systematic 
; 
 ? 
; 
_chemical_name_common             ? 
_chemical_formula_moiety          ? 
_chemical_formula_structural      ? 
_chemical_formula_analytical      ? 
_chemical_formula_sum             'C53 H44 F6 Ir O3.50 P5 Pt' 
_chemical_formula_weight          1393.02 
_chemical_melting_point           ? 
_chemical_compound_source         ? 
  
loop_ 
 _atom_type_symbol 
 _atom_type_description 
 _atom_type_scat_dispersion_real 
 _atom_type_scat_dispersion_imag 
 _atom_type_scat_source 
 'C'  'C'   0.0033   0.0016 
 'International Tables Vol C Tables 4.2.6.8 and 6.1.1.4' 
 'H'  'H'   0.0000   0.0000 
 'International Tables Vol C Tables 4.2.6.8 and 6.1.1.4' 
 'O'  'O'   0.0106   0.0060 
 'International Tables Vol C Tables 4.2.6.8 and 6.1.1.4' 
 'F'  'F'   0.0171   0.0103 
 'International Tables Vol C Tables 4.2.6.8 and 6.1.1.4' 
 'P'  'P'   0.1023   0.0942 
 'International Tables Vol C Tables 4.2.6.8 and 6.1.1.4' 
 'Ir'  'Ir'  -1.4442   7.9887 
 'International Tables Vol C Tables 4.2.6.8 and 6.1.1.4' 
 'Pt'  'Pt'  -1.7033   8.3905 
 'International Tables Vol C Tables 4.2.6.8 and 6.1.1.4' 
  
_symmetry_cell_setting            Orthorhombic 
_symmetry_space_group_name_H-M    Ccca 
  
loop_ 
 _symmetry_equiv_pos_as_xyz 
 'x, y, z' 
 '-x+1/2, -y, z' 
 '-x, y, -z+1/2' 
 'x+1/2, -y, -z+1/2' 
 'x+1/2, y+1/2, z' 
 '-x+1, -y+1/2, z' 
 '-x+1/2, y+1/2, -z+1/2' 
 'x+1, -y+1/2, -z+1/2' 
 '-x, -y, -z' 
 'x-1/2, y, -z' 
 'x, -y, z-1/2' 
 '-x-1/2, y, z-1/2' 
 '-x+1/2, -y+1/2, -z' 
 'x, y+1/2, -z' 
 'x+1/2, -y+1/2, z-1/2' 
 '-x, y+1/2, z-1/2' 
  
_cell_length_a                    20.1924(3) 
_cell_length_b                    44.8906(14) 
_cell_length_c                    23.3886(8) 
_cell_angle_alpha                 90.00 
_cell_angle_beta                  90.00 
_cell_angle_gamma                 90.00 
_cell_volume                      21200.6(10) 
_cell_formula_units_Z             16 
_cell_measurement_temperature     294(2) 
_cell_measurement_reflns_used     ? 
_cell_measurement_theta_min       ? 
_cell_measurement_theta_max       ? 
  
_exptl_crystal_description        ? 
_exptl_crystal_colour             ? 
_exptl_crystal_size_max           0.20 
_exptl_crystal_size_mid           0.20 
_exptl_crystal_size_min           0.20 
_exptl_crystal_density_meas       ? 
_exptl_crystal_density_diffrn     1.746 
_exptl_crystal_density_method     ? 
_exptl_crystal_F_000              10784 
_exptl_absorpt_coefficient_mu     5.359 
_exptl_absorpt_correction_type    none 
_exptl_absorpt_correction_T_min   ? 
_exptl_absorpt_correction_T_max   ? 
  
_exptl_special_details 
; 
 ? 
; 
  
_diffrn_ambient_temperature       294(2) 
_diffrn_radiation_wavelength      0.71073 
_diffrn_radiation_type            MoK\a 
_diffrn_radiation_source          'fine-focus sealed tube' 
_diffrn_radiation_monochromator   graphite 
_diffrn_measurement_device        'Siemens P4' 
_diffrn_measurement_method        '\w scans' 
_diffrn_standards_number          ? 
_diffrn_standards_interval_count  ? 
_diffrn_standards_interval_time   ? 
_diffrn_standards_decay_%         ? 
_diffrn_reflns_number             9345 
_diffrn_reflns_av_R_equivalents   0.0000 
_diffrn_reflns_av_sigmaI/netI     0.0885 
_diffrn_reflns_limit_h_min        0 
_diffrn_reflns_limit_h_max        28 
_diffrn_reflns_limit_k_min        0 
_diffrn_reflns_limit_k_max        63 
_diffrn_reflns_limit_l_min        0 
_diffrn_reflns_limit_l_max        33 
_diffrn_reflns_theta_min          1.41 
_diffrn_reflns_theta_max          25.00 
_reflns_number_total              9345 
_reflns_number_observed           5485 
_reflns_observed_criterion        >2sigma(I) 
  
_computing_data_collection        'Nonius KCD' 
_computing_cell_refinement        'Nonius DENZO' 
_computing_data_reduction         'SHEXLTL' 
_computing_structure_solution     'SHELXS-86 (Sheldrick, 1990)' 
_computing_structure_refinement   'SHELXL-93 (Sheldrick, 1993)' 
_computing_molecular_graphics     'Siemens SHELXTL' 
_computing_publication_material   'Siemens SHELXTL' 
  
_refine_special_details 
; 
 Refinement on F^2^ for ALL reflections except for 32 with very negative F^2^ 
 or flagged by the user for potential systematic errors.  Weighted R-factors 
 wR and all goodnesses of fit S are based on F^2^, conventional R-factors R 
 are based on F, with F set to zero for negative F^2^. The observed criterion 
 of F^2^ > 2sigma(F^2^) is used only for calculating _R_factor_obs etc. and
is 
 not relevant to the choice of reflections for refinement.  R-factors based 
 on F^2^ are statistically about twice as large as those based on F, and R- 
 factors based on ALL data will be even larger. 
; 
  
_refine_ls_structure_factor_coef  Fsqd 
_refine_ls_matrix_type            full 
_refine_ls_weighting_scheme 
 'calc w=1/[\s^2^(Fo^2^)+(0.0328P)^2^+0.0000P] where P=(Fo^2^+2Fc^2^)/3' 
_atom_sites_solution_primary      direct 
_atom_sites_solution_secondary    difmap 
_atom_sites_solution_hydrogens    geom 
_refine_ls_hydrogen_treatment     ? 
_refine_ls_extinction_method      SHELXL 
_refine_ls_extinction_coef        0.000000(4) 
_refine_ls_extinction_expression 
 'Fc^*^=kFc[1+0.001xFc^2^\l^3^/sin(2\q)]^-1/4^' 
_refine_ls_number_reflns          9313 
_refine_ls_number_parameters      632 
_refine_ls_number_restraints      0 
_refine_ls_R_factor_all           0.0949 
_refine_ls_R_factor_obs           0.0414 
_refine_ls_wR_factor_all          0.1328 
_refine_ls_wR_factor_obs          0.0798 
_refine_ls_goodness_of_fit_all    1.011 
_refine_ls_goodness_of_fit_obs    1.218 
_refine_ls_restrained_S_all       1.517 
_refine_ls_restrained_S_obs       1.218 
_refine_ls_shift/esd_max          -14.334 
_refine_ls_shift/esd_mean         0.031 
  
loop_ 
 _atom_site_label 
 _atom_site_type_symbol 
 _atom_site_fract_x 
 _atom_site_fract_y 
 _atom_site_fract_z 
 _atom_site_U_iso_or_equiv 
 _atom_site_thermal_displace_type 
 _atom_site_occupancy 
 _atom_site_calc_flag 
 _atom_site_refinement_flags 
 _atom_site_disorder_group 
Pt1 Pt 0.265877(14) 0.366806(7) 0.135662(13) 0.04254(11) Uani 1 d . . 
Ir1 Ir 0.155254(13) 0.386308(7) 0.076690(14) 0.04186(11) Uani 1 d . . 
P1 P 0.30156(9) 0.41580(5) 0.13577(10) 0.0442(5) Uani 1 d . . 
P2 P 0.21679(10) 0.32021(5) 0.13103(10) 0.0467(6) Uani 1 d . . 
P3 P 0.15936(9) 0.42764(5) 0.13509(9) 0.0448(5) Uani 1 d . . 
P4 P 0.17258(9) 0.34443(5) 0.02242(9) 0.0426(5) Uani 1 d . . 
O1 O 0.3838(3) 0.3444(2) 0.2033(3) 0.095(2) Uani 1 d . . 
O2 O 0.0194(3) 0.3662(2) 0.1158(3) 0.127(3) Uani 1 d . . 
O3 O 0.1571(4) 0.4218(2) -0.0333(3) 0.100(3) Uani 1 d . . 
C1 C 0.3417(4) 0.3528(2) 0.1768(4) 0.062(3) Uani 1 d . . 
C2 C 0.0716(5) 0.3728(2) 0.1038(4) 0.073(3) Uani 1 d . . 
C3 C 0.1603(4) 0.4096(2) 0.0089(4) 0.058(2) Uani 1 d . . 
C4 C 0.2403(3) 0.4453(2) 0.1229(3) 0.048(2) Uani 1 d . . 
H4A H 0.2436(3) 0.4526(2) 0.0840(3) 0.058 Uiso 1 calc R . 
H4B H 0.2470(3) 0.4617(2) 0.1490(3) 0.058 Uiso 1 calc R . 
C5 C 0.1623(3) 0.3127(2) 0.0692(3) 0.052(2) Uani 1 d . . 
H5A H 0.1754(3) 0.2944(2) 0.0501(3) 0.062 Uiso 1 calc R . 
H5B H 0.1165(3) 0.3108(2) 0.0814(3) 0.062 Uiso 1 calc R . 
C11 C 0.3794(8) 0.4485(4) 0.3094(7) 0.144(6) Uani 1 d . . 
H11A H 0.3939(8) 0.4555(4) 0.3447(7) 0.172 Uiso 1 calc R . 
C12 C 0.3428(6) 0.4244(3) 0.3064(6) 0.103(4) Uani 1 d . . 
H12A H 0.3317(6) 0.4141(3) 0.3396(6) 0.124 Uiso 1 calc R . 
C13 C 0.3205(4) 0.4141(2) 0.2540(4) 0.072(3) Uani 1 d . . 
H13A H 0.2935(4) 0.3973(2) 0.2530(4) 0.086 Uiso 1 calc R . 
C14 C 0.3368(4) 0.4278(2) 0.2034(4) 0.059(2) Uani 1 d . . 
C15 C 0.3756(5) 0.4533(2) 0.2040(5) 0.091(3) Uani 1 d . . 
H15A H 0.3875(5) 0.4632(2) 0.1706(5) 0.109 Uiso 1 calc R . 
C16 C 0.3963(6) 0.4634(3) 0.2598(7) 0.136(6) Uani 1 d . . 
H16A H 0.4219(6) 0.4806(3) 0.2625(7) 0.163 Uiso 1 calc R . 
C21 C 0.4299(4) 0.4102(2) 0.0975(4) 0.071(3) Uani 1 d . . 
H21A H 0.4373(4) 0.4015(2) 0.1330(4) 0.085 Uiso 1 calc R . 
C22 C 0.4815(4) 0.4123(2) 0.0583(5) 0.077(3) Uani 1 d . . 
H22A H 0.5233(4) 0.4054(2) 0.0681(5) 0.092 Uiso 1 calc R . 
C23 C 0.4715(5) 0.4244(2) 0.0065(5) 0.077(3) Uani 1 d . . 
H23A H 0.5064(5) 0.4257(2) -0.0194(5) 0.093 Uiso 1 calc R . 
C24 C 0.4105(5) 0.4348(2) -0.0085(4) 0.067(3) Uani 1 d . . 
H24A H 0.4038(5) 0.4432(2) -0.0444(4) 0.081 Uiso 1 calc R . 
C25 C 0.3574(4) 0.4330(2) 0.0307(4) 0.053(2) Uani 1 d . . 
H25A H 0.3157(4) 0.4398(2) 0.0202(4) 0.064 Uiso 1 calc R . 
C26 C 0.3671(3) 0.4211(2) 0.0838(4) 0.047(2) Uani 1 d . . 
C31 C 0.2756(4) 0.2895(2) 0.1276(4) 0.059(2) Uani 1 d . . 
C32 C 0.2627(6) 0.2624(3) 0.1525(5) 0.114(4) Uani 1 d . . 
H32A H 0.2242(6) 0.2601(3) 0.1740(5) 0.136 Uiso 1 calc R . 
C33 C 0.3045(9) 0.2390(3) 0.1467(7) 0.171(7) Uani 1 d . . 
H33A H 0.2950(9) 0.2210(3) 0.1647(7) 0.205 Uiso 1 calc R . 
C34 C 0.3597(7) 0.2419(3) 0.1149(7) 0.118(5) Uani 1 d . . 
H34A H 0.3883(7) 0.2257(3) 0.1109(7) 0.141 Uiso 1 calc R . 
C35 C 0.3744(5) 0.2683(3) 0.0884(5) 0.102(4) Uani 1 d . . 
H35A H 0.4127(5) 0.2703(3) 0.0666(5) 0.123 Uiso 1 calc R . 
C36 C 0.3313(4) 0.2920(2) 0.0947(4) 0.071(3) Uani 1 d . . 
H36A H 0.3404(4) 0.3099(2) 0.0764(4) 0.085 Uiso 1 calc R . 
C41 C 0.1695(4) 0.3120(2) 0.1962(4) 0.059(2) Uani 1 d . . 
C42 C 0.1961(5) 0.3190(3) 0.2462(5) 0.100(4) Uani 1 d . . 
H42A H 0.2373(5) 0.3282(3) 0.2472(5) 0.120 Uiso 1 calc R . 
C43 C 0.1629(5) 0.3128(3) 0.2975(4) 0.097(4) Uani 1 d . . 
H43A H 0.1829(5) 0.3175(3) 0.3322(4) 0.117 Uiso 1 calc R . 
C44 C 0.1064(7) 0.3009(4) 0.2971(5) 0.149(7) Uani 1 d . . 
H44A H 0.0922(7) 0.2884(4) 0.3264(5) 0.179 Uiso 1 calc R 1 
C45 C 0.0658(9) 0.3078(6) 0.2497(10) 0.092(8) Uani 0.50 d P 1 
H45A H 0.0199(9) 0.3086(6) 0.2534(10) 0.110 Uiso 0.50 calc PR 1 
C45' C 0.0995(9) 0.2802(4) 0.2482(8) 0.059(5) Uani 0.50 d P 2 
H45B H 0.0769(9) 0.2623(4) 0.2522(8) 0.070 Uiso 0.50 calc PR 2 
C46 C 0.0959(10) 0.3132(5) 0.1977(9) 0.078(6) Uani 0.50 d P 1 
H46B H 0.0713(10) 0.3173(5) 0.1650(9) 0.094 Uiso 0.50 calc PR 1 
C46' C 0.1264(8) 0.2880(5) 0.1983(8) 0.056(5) Uani 0.50 d P 2 
H46A H 0.1163(8) 0.2774(5) 0.1652(8) 0.067 Uiso 0.50 calc PR 2 
C51 C 0.1553(4) 0.4239(2) 0.2121(4) 0.052(2) Uani 1 d . . 
C52 C 0.1700(4) 0.4468(2) 0.2473(4) 0.070(3) Uani 1 d . . 
H52A H 0.1826(4) 0.4649(2) 0.2314(4) 0.084 Uiso 1 calc R . 
C53 C 0.1670(5) 0.4442(3) 0.3047(6) 0.099(4) Uani 1 d . . 
H53A H 0.1779(5) 0.4604(3) 0.3275(6) 0.119 Uiso 1 calc R . 
C54 C 0.1486(8) 0.4188(4) 0.3288(6) 0.132(6) Uani 1 d . . 
H54A H 0.1472(8) 0.4172(4) 0.3684(6) 0.159 Uiso 1 calc R . 
C55 C 0.1319(6) 0.3954(3) 0.2960(6) 0.123(5) Uani 1 d . . 
H55A H 0.1180(6) 0.3777(3) 0.3129(6) 0.148 Uiso 1 calc R . 
C56 C 0.1355(5) 0.3975(2) 0.2372(4) 0.081(3) Uani 1 d . . 
H56A H 0.1247(5) 0.3812(2) 0.2146(4) 0.097 Uiso 1 calc R . 
C61 C 0.0977(4) 0.4565(2) 0.1210(4) 0.052(2) Uani 1 d . . 
C62 C 0.1050(4) 0.4763(2) 0.0782(4) 0.065(3) Uani 1 d . . 
H62A H 0.1442(4) 0.4764(2) 0.0573(4) 0.079 Uiso 1 calc R . 
C63 C 0.0568(5) 0.4963(2) 0.0646(5) 0.085(3) Uani 1 d . . 
H63A H 0.0635(5) 0.5095(2) 0.0345(5) 0.102 Uiso 1 calc R . 
C64 C -0.0016(5) 0.4972(2) 0.0946(5) 0.077(3) Uani 1 d . . 
H64A H -0.0344(5) 0.5110(2) 0.0859(5) 0.093 Uiso 1 calc R . 
C65 C -0.0093(5) 0.4775(2) 0.1370(5) 0.084(3) Uani 1 d . . 
H65A H -0.0488(5) 0.4773(2) 0.1575(5) 0.101 Uiso 1 calc R . 
C66 C 0.0396(4) 0.4574(2) 0.1512(4) 0.065(3) Uani 1 d . . 
H66A H 0.0331(4) 0.4443(2) 0.1815(4) 0.078 Uiso 1 calc R . 
C71 C 0.1181(4) 0.3394(2) -0.0379(4) 0.047(2) Uani 1 d . . 
C72 C 0.1387(5) 0.3472(2) -0.0910(4) 0.075(3) Uani 1 d . . 
H72A H 0.1819(5) 0.3540(2) -0.0960(4) 0.090 Uiso 1 calc R . 
C73 C 0.0979(6) 0.3454(3) -0.1374(5) 0.096(4) Uani 1 d . . 
H73A H 0.1140(6) 0.3508(3) -0.1732(5) 0.115 Uiso 1 calc R . 
C74 C 0.0346(6) 0.3360(3) -0.1325(5) 0.094(4) Uani 1 d . . 
H74A H 0.0073(6) 0.3345(3) -0.1644(5) 0.112 Uiso 1 calc R . 
C75 C 0.0125(5) 0.3289(3) -0.0798(6) 0.101(4) Uani 1 d . . 
H75A H -0.0315(5) 0.3233(3) -0.0753(6) 0.121 Uiso 1 calc R . 
C76 C 0.0541(4) 0.3298(2) -0.0312(4) 0.072(3) Uani 1 d . . 
H76A H 0.0384(4) 0.3240(2) 0.0044(4) 0.086 Uiso 1 calc R . 
C81 C 0.2538(4) 0.3386(2) -0.0088(3) 0.043(2) Uani 1 d . . 
C82 C 0.2694(4) 0.3112(2) -0.0315(3) 0.058(2) Uani 1 d . . 
H82A H 0.2378(4) 0.2961(2) -0.0324(3) 0.070 Uiso 1 calc R . 
C83 C 0.3323(5) 0.3061(2) -0.0530(4) 0.069(3) Uani 1 d . . 
H83A H 0.3430(5) 0.2875(2) -0.0678(4) 0.083 Uiso 1 calc R . 
C84 C 0.3785(5) 0.3281(3) -0.0527(4) 0.071(3) Uani 1 d . . 
H84A H 0.4205(5) 0.3245(3) -0.0674(4) 0.086 Uiso 1 calc R . 
C85 C 0.3637(4) 0.3550(2) -0.0312(4) 0.067(3) Uani 1 d . . 
H85A H 0.3955(4) 0.3700(2) -0.0314(4) 0.080 Uiso 1 calc R . 
C86 C 0.3014(4) 0.3607(2) -0.0086(3) 0.055(2) Uani 1 d . . 
H86A H 0.2917(4) 0.3793(2) 0.0067(3) 0.067 Uiso 1 calc R . 
P5 P 0.2500 0.5000 -0.0621(2) 0.0767(12) Uani 1 d S . 
F1 F 0.2589(3) 0.4658(2) -0.0636(3) 0.141(3) Uiso 1 d . . 
F2 F 0.2349(6) 0.4958(3) -0.1301(4) 0.101(4) Uiso 0.50 d P . 
F3 F 0.3264(3) 0.5033(2) -0.0615(3) 0.128(2) Uiso 1 d . . 
F4 F 0.2507(6) 0.5093(2) 0.0049(4) 0.092(4) Uiso 0.50 d P . 
P6 P 0.0000 0.2500 0.0775(2) 0.0649(10) Uani 1 d S . 
F7 F -0.0077(14) 0.2528(7) 0.1452(5) 0.126(5) Uiso 0.50 d P . 
F8 F -0.0018(4) 0.2148(2) 0.0943(5) 0.055(3) Uiso 0.50 d P . 
F9 F 0.0000 0.2500 0.0135(6) 0.179(5) Uiso 1 d S . 
F10 F 0.0777(4) 0.2496(2) 0.0921(5) 0.061(3) Uiso 0.50 d P . 
F8' F 0.0026(6) 0.2157(3) 0.0637(6) 0.101(5) Uiso 0.50 d P 3 
F10' F 0.0777(5) 0.2519(3) 0.0618(5) 0.073(4) Uiso 0.50 d P 3 
O100 O 0.0000 0.2743(6) -0.2500 0.127(10) Uiso 0.50 d SP . 
O101 O -0.0403(11) 0.2767(5) -0.2440(9) 0.059(6) Uiso 0.25 d P . 
  
loop_ 
 _atom_site_aniso_label 
 _atom_site_aniso_U_11 
 _atom_site_aniso_U_22 
 _atom_site_aniso_U_33 
 _atom_site_aniso_U_23 
 _atom_site_aniso_U_13 
 _atom_site_aniso_U_12 
Pt1 0.0453(2) 0.0404(2) 0.0420(2) -0.0010(2) 0.00165(15) -0.0035(2) 
Ir1 0.0396(2) 0.0419(2) 0.0441(2) -0.0072(2) 0.00395(15) -0.00128(15) 
P1 0.0418(12) 0.0426(14) 0.0483(14) -0.0044(12) 0.0013(10) -0.0017(10) 
P2 0.0561(13) 0.0414(14) 0.0426(14) 0.0008(12) 0.0043(10) -0.0077(10) 
P3 0.0414(11) 0.0443(14) 0.0486(14) -0.0082(12) 0.0044(11) 0.0006(10) 
P4 0.0476(12) 0.0414(14) 0.0387(14) -0.0032(11) 0.0021(10) -0.0038(10) 
O1 0.085(5) 0.102(6) 0.100(6) 0.013(5) -0.036(4) 0.017(4) 
O2 0.062(5) 0.150(8) 0.168(9) -0.054(6) 0.056(5) -0.050(5) 
O3 0.147(6) 0.083(6) 0.071(6) 0.025(5) -0.008(5) -0.013(5) 
C1 0.065(6) 0.059(7) 0.061(7) -0.004(5) -0.011(5) 0.001(5) 
C2 0.060(6) 0.081(8) 0.079(7) -0.039(6) 0.002(5) -0.006(5) 
C3 0.068(5) 0.045(6) 0.061(7) -0.003(5) 0.000(5) 0.004(5) 
C4 0.054(5) 0.039(5) 0.052(6) -0.001(4) 0.005(4) -0.001(4) 
C5 0.057(5) 0.040(5) 0.059(6) -0.008(5) 0.003(4) -0.003(4) 
C11 0.188(16) 0.158(18) 0.085(12) -0.028(12) -0.034(11) -0.006(13) 
C12 0.137(10) 0.090(10) 0.081(10) -0.009(8) -0.012(8) -0.012(8) 
C13 0.077(6) 0.073(8) 0.065(8) -0.020(7) -0.007(6) 0.005(5) 
C14 0.057(5) 0.056(6) 0.062(7) -0.013(6) 0.002(5) -0.008(5) 
C15 0.100(7) 0.076(8) 0.097(10) -0.010(7) -0.013(7) -0.029(6) 
C16 0.116(10) 0.111(13) 0.181(17) -0.078(12) -0.048(11) -0.037(9) 
C21 0.054(6) 0.067(7) 0.092(8) 0.024(6) 0.014(5) 0.003(5) 
C22 0.061(6) 0.082(8) 0.088(9) 0.015(7) 0.017(6) 0.017(5) 
C23 0.067(7) 0.059(7) 0.105(10) -0.006(7) 0.036(6) -0.009(5) 
C24 0.091(7) 0.058(7) 0.053(7) -0.002(5) 0.020(6) -0.014(6) 
C25 0.049(5) 0.047(6) 0.063(7) -0.010(5) 0.005(5) 0.001(4) 
C26 0.047(5) 0.040(5) 0.053(6) 0.001(5) 0.004(4) 0.000(4) 
C31 0.079(6) 0.038(6) 0.060(7) 0.005(5) 0.002(5) 0.003(5) 
C32 0.125(9) 0.057(8) 0.158(13) 0.017(8) 0.045(8) 0.016(8) 
C33 0.195(16) 0.062(10) 0.255(22) 0.051(12) 0.064(15) 0.026(11) 
C34 0.142(12) 0.049(9) 0.162(15) -0.020(9) -0.030(10) 0.038(9) 
C35 0.094(8) 0.085(10) 0.128(12) -0.030(9) -0.006(7) 0.030(7) 
C36 0.075(6) 0.070(8) 0.068(8) -0.002(6) 0.005(5) 0.013(5) 
C41 0.066(6) 0.060(7) 0.052(7) -0.003(5) -0.001(5) -0.010(5) 
C42 0.077(7) 0.167(13) 0.056(8) 0.012(8) 0.002(6) -0.038(7) 
C43 0.111(9) 0.150(12) 0.032(7) 0.012(7) 0.002(6) -0.014(8) 
C44 0.121(11) 0.266(19) 0.060(9) 0.038(12) 0.021(8) -0.098(12) 
C45 0.045(11) 0.155(27) 0.076(19) 0.005(17) 0.020(12) -0.005(13) 
C45' 0.062(12) 0.064(14) 0.050(14) 0.016(11) 0.007(10) -0.008(10) 
C46 0.084(15) 0.081(18) 0.069(17) 0.002(14) 0.013(12) -0.020(13) 
C46' 0.058(11) 0.069(15) 0.040(12) -0.019(11) 0.008(9) -0.021(11) 
C51 0.053(5) 0.051(6) 0.051(6) -0.009(5) 0.009(4) 0.003(4) 
C52 0.088(7) 0.077(8) 0.045(7) -0.027(6) 0.011(5) -0.004(5) 
C53 0.110(9) 0.098(11) 0.090(11) -0.044(9) -0.003(8) 0.010(8) 
C54 0.207(15) 0.142(15) 0.049(9) -0.029(10) 0.010(9) 0.028(13) 
C55 0.198(13) 0.109(12) 0.063(9) 0.015(9) 0.027(9) -0.002(10) 
C56 0.123(8) 0.070(8) 0.051(7) -0.010(6) 0.024(6) 0.014(6) 
C61 0.049(5) 0.044(6) 0.062(7) -0.015(5) -0.001(4) -0.003(4) 
C62 0.053(5) 0.057(7) 0.087(8) -0.008(6) 0.000(5) -0.002(5) 
C63 0.075(7) 0.052(7) 0.127(10) 0.023(7) -0.011(7) 0.003(5) 
C64 0.068(7) 0.061(8) 0.103(10) -0.014(7) -0.023(6) 0.018(6) 
C65 0.059(6) 0.089(9) 0.105(10) -0.004(8) 0.013(6) 0.011(6) 
C66 0.046(5) 0.068(7) 0.082(8) 0.004(6) 0.014(5) 0.013(5) 
C71 0.054(5) 0.043(6) 0.042(6) -0.005(4) -0.004(4) 0.001(4) 
C72 0.079(7) 0.091(9) 0.055(7) -0.010(6) -0.010(6) -0.010(6) 
C73 0.093(8) 0.134(11) 0.060(8) 0.016(8) 0.003(7) -0.006(8) 
C74 0.117(10) 0.090(10) 0.074(10) -0.011(8) -0.026(8) 0.021(8) 
C75 0.056(6) 0.105(10) 0.142(13) -0.008(10) -0.024(8) -0.020(6) 
C76 0.071(6) 0.081(8) 0.064(8) -0.015(6) -0.014(5) -0.011(5) 
C81 0.063(5) 0.025(5) 0.041(5) -0.006(4) 0.009(4) 0.002(4) 
C82 0.066(6) 0.052(6) 0.055(6) 0.001(5) 0.017(5) 0.010(5) 
C83 0.084(7) 0.061(7) 0.063(7) -0.016(6) 0.003(5) 0.031(6) 
C84 0.060(6) 0.090(9) 0.063(7) -0.017(7) -0.003(5) 0.013(6) 
C85 0.054(6) 0.084(8) 0.063(7) -0.011(6) 0.005(5) -0.014(5) 
C86 0.067(6) 0.053(7) 0.046(6) -0.011(5) 0.005(4) 0.005(5) 
P5 0.069(2) 0.075(3) 0.086(3) 0.000 0.000 0.006(2) 
P6 0.055(2) 0.051(2) 0.088(3) 0.000 0.000 0.007(2) 
  
_geom_special_details 
; 
 All esds (except the esd in the dihedral angle between two l.s. planes) 
 are estimated using the full covariance matrix.  The cell esds are taken 
 into account individually in the estimation of esds in distances, angles 
 and torsion angles; correlations between esds in cell parameters are only 
 used when they are defined by crystal symmetry.  An approximate (isotropic) 
 treatment of cell esds is used for estimating esds involving l.s. planes. 
; 
  
loop_ 
 _geom_bond_atom_site_label_1 
 _geom_bond_atom_site_label_2 
 _geom_bond_distance 
 _geom_bond_site_symmetry_2 
 _geom_bond_publ_flag 
Pt1 C1 1.914(9) . ? 
Pt1 P1 2.314(2) . ? 
Pt1 P2 2.317(2) . ? 
Pt1 Ir1 2.7674(4) . ? 
Ir1 C3 1.903(10) . ? 
Ir1 C2 1.905(10) . ? 
Ir1 P4 2.295(2) . ? 
Ir1 P3 2.305(2) . ? 
P1 C26 1.812(8) . ? 
P1 C14 1.817(9) . ? 
P1 C4 1.835(7) . ? 
P2 C31 1.822(9) . ? 
P2 C41 1.835(9) . ? 
P2 C5 1.848(7) . ? 
P3 C51 1.810(9) . ? 
P3 C61 1.828(9) . ? 
P3 C4 1.839(7) . ? 
P4 C71 1.802(8) . ? 
P4 C5 1.810(8) . ? 
P4 C81 1.815(7) . ? 
O1 C1 1.118(9) . ? 
O2 C2 1.129(9) . ? 
O3 C3 1.131(9) . ? 
C11 C12 1.31(2) . ? 
C11 C16 1.38(2) . ? 
C12 C13 1.385(13) . ? 
C13 C14 1.373(12) . ? 
C14 C15 1.386(11) . ? 
C15 C16 1.44(2) . ? 
C21 C22 1.390(11) . ? 
C21 C26 1.396(10) . ? 
C22 C23 1.344(12) . ? 
C23 C24 1.364(11) . ? 
C24 C25 1.411(10) . ? 
C25 C26 1.368(10) . ? 
C31 C36 1.368(11) . ? 
C31 C32 1.372(13) . ? 
C32 C33 1.356(15) . ? 
C33 C34 1.35(2) . ? 
C34 C35 1.37(2) . ? 
C35 C36 1.380(13) . ? 
C41 C42 1.324(12) . ? 
C41 C46' 1.39(2) . ? 
C41 C46 1.49(2) . ? 
C42 C43 1.403(12) . ? 
C43 C44 1.260(13) . ? 
C44 C45 1.41(2) . ? 
C44 C45' 1.48(2) . ? 
C45 C46 1.38(3) . ? 
C45' C46' 1.33(2) . ? 
C51 C52 1.348(11) . ? 
C51 C56 1.383(12) . ? 
C52 C53 1.349(14) . ? 
C53 C54 1.33(2) . ? 
C54 C55 1.35(2) . ? 
C55 C56 1.379(13) . ? 
C61 C62 1.348(11) . ? 
C61 C66 1.370(11) . ? 
C62 C63 1.358(11) . ? 
C63 C64 1.374(12) . ? 
C64 C65 1.337(12) . ? 
C65 C66 1.379(12) . ? 
C71 C72 1.356(11) . ? 
C71 C76 1.373(10) . ? 
C72 C73 1.365(12) . ? 
C73 C74 1.351(13) . ? 
C74 C75 1.350(14) . ? 
C75 C76 1.412(13) . ? 
C81 C82 1.374(10) . ? 
C81 C86 1.383(9) . ? 
C82 C83 1.385(10) . ? 
C83 C84 1.360(12) . ? 
C84 C85 1.342(12) . ? 
C85 C86 1.388(10) . ? 
P5 F1 1.545(8) . ? 
P5 F1 1.545(8) 2_565 ? 
P5 F3 1.550(6) 2_565 ? 
P5 F3 1.550(6) . ? 
P5 F4 1.624(10) 2_565 ? 
P5 F4 1.624(10) . ? 
P5 F2 1.629(10) . ? 
P5 F2 1.629(10) 2_565 ? 
F2 F2 0.72(2) 2_565 ? 
F4 F4 0.83(2) 2_565 ? 
P6 F9 1.498(13) . ? 
P6 F8' 1.573(14) . ? 
P6 F8' 1.573(14) 6_455 ? 
P6 F7 1.595(11) . ? 
P6 F7 1.595(11) 6_455 ? 
P6 F10 1.605(9) 6_455 ? 
P6 F10 1.605(9) . ? 
P6 F10' 1.613(10) 6_455 ? 
P6 F10' 1.613(10) . ? 
P6 F8 1.628(10) . ? 
P6 F8 1.628(10) 6_455 ? 
F7 F7 0.40(5) 6_455 ? 
F8 F8' 0.72(2) . ? 
F10 F10' 0.716(14) . ? 
O100 O101 0.83(2) . ? 
O100 O101 0.83(2) 3_554 ? 
O101 O101 1.65(5) 3_554 ? 
  
loop_ 
 _geom_angle_atom_site_label_1 
 _geom_angle_atom_site_label_2 
 _geom_angle_atom_site_label_3 
 _geom_angle 
 _geom_angle_site_symmetry_1 
 _geom_angle_site_symmetry_3 
 _geom_angle_publ_flag 
C1 Pt1 P1 93.6(3) . . ? 
C1 Pt1 P2 93.9(3) . . ? 
P1 Pt1 P2 172.33(7) . . ? 
C1 Pt1 Ir1 179.1(3) . . ? 
P1 Pt1 Ir1 87.20(5) . . ? 
P2 Pt1 Ir1 85.24(5) . . ? 
C3 Ir1 C2 120.0(4) . . ? 
C3 Ir1 P4 88.9(3) . . ? 
C2 Ir1 P4 93.3(3) . . ? 
C3 Ir1 P3 92.9(3) . . ? 
C2 Ir1 P3 95.3(3) . . ? 
P4 Ir1 P3 168.92(7) . . ? 
C3 Ir1 Pt1 123.1(2) . . ? 
C2 Ir1 Pt1 116.7(3) . . ? 
P4 Ir1 Pt1 83.89(5) . . ? 
P3 Ir1 Pt1 86.00(5) . . ? 
C26 P1 C14 105.0(4) . . ? 
C26 P1 C4 106.7(4) . . ? 
C14 P1 C4 101.1(4) . . ? 
C26 P1 Pt1 110.5(3) . . ? 
C14 P1 Pt1 113.9(3) . . ? 
C4 P1 Pt1 118.4(2) . . ? 
C31 P2 C41 102.9(4) . . ? 
C31 P2 C5 102.4(4) . . ? 
C41 P2 C5 107.6(4) . . ? 
C31 P2 Pt1 114.0(3) . . ? 
C41 P2 Pt1 111.4(3) . . ? 
C5 P2 Pt1 117.2(3) . . ? 
C51 P3 C61 102.4(4) . . ? 
C51 P3 C4 103.6(4) . . ? 
C61 P3 C4 105.9(4) . . ? 
C51 P3 Ir1 120.9(3) . . ? 
C61 P3 Ir1 116.0(3) . . ? 
C4 P3 Ir1 106.6(3) . . ? 
C71 P4 C5 107.8(4) . . ? 
C71 P4 C81 102.6(4) . . ? 
C5 P4 C81 103.5(4) . . ? 
C71 P4 Ir1 116.2(3) . . ? 
C5 P4 Ir1 107.0(3) . . ? 
C81 P4 Ir1 118.7(3) . . ? 
O1 C1 Pt1 176.2(9) . . ? 
O2 C2 Ir1 173.6(10) . . ? 
O3 C3 Ir1 172.3(9) . . ? 
P1 C4 P3 105.3(4) . . ? 
P4 C5 P2 105.1(4) . . ? 
C12 C11 C16 119.6(15) . . ? 
C11 C12 C13 120.4(14) . . ? 
C14 C13 C12 122.3(10) . . ? 
C13 C14 C15 119.9(9) . . ? 
C13 C14 P1 121.5(7) . . ? 
C15 C14 P1 118.3(8) . . ? 
C14 C15 C16 115.5(11) . . ? 
C11 C16 C15 122.3(13) . . ? 
C22 C21 C26 120.4(9) . . ? 
C23 C22 C21 120.7(9) . . ? 
C22 C23 C24 120.3(9) . . ? 
C23 C24 C25 120.0(9) . . ? 
C26 C25 C24 120.3(8) . . ? 
C25 C26 C21 118.3(7) . . ? 
C25 C26 P1 123.8(6) . . ? 
C21 C26 P1 117.7(7) . . ? 
C36 C31 C32 117.9(9) . . ? 
C36 C31 P2 119.9(7) . . ? 
C32 C31 P2 121.8(8) . . ? 
C33 C32 C31 121.7(11) . . ? 
C34 C33 C32 119.7(13) . . ? 
C33 C34 C35 120.7(12) . . ? 
C34 C35 C36 118.8(12) . . ? 
C31 C36 C35 121.1(11) . . ? 
C42 C41 C46' 114.1(11) . . ? 
C42 C41 C46 112.1(12) . . ? 
C42 C41 P2 118.3(7) . . ? 
C46' C41 P2 120.8(10) . . ? 
C46 C41 P2 122.2(10) . . ? 
C41 C42 C43 121.0(9) . . ? 
C44 C43 C42 120.7(11) . . ? 
C43 C44 C45 116.0(14) . . ? 
C43 C44 C45' 110.9(13) . . ? 
C46 C45 C44 118.2(17) . . ? 
C46' C45' C44 118.3(16) . . ? 
C45 C46 C41 117.1(19) . . ? 
C45' C46' C41 119.3(16) . . ? 
C52 C51 C56 117.2(9) . . ? 
C52 C51 P3 121.8(8) . . ? 
C56 C51 P3 121.0(7) . . ? 
C53 C52 C51 122.2(11) . . ? 
C54 C53 C52 120.6(13) . . ? 
C53 C54 C55 120.0(14) . . ? 
C54 C55 C56 120.0(13) . . ? 
C51 C56 C55 119.9(11) . . ? 
C62 C61 C66 117.3(8) . . ? 
C62 C61 P3 121.9(7) . . ? 
C66 C61 P3 120.7(8) . . ? 
C61 C62 C63 122.0(9) . . ? 
C62 C63 C64 121.0(10) . . ? 
C65 C64 C63 117.4(9) . . ? 
C64 C65 C66 121.8(9) . . ? 
C61 C66 C65 120.5(9) . . ? 
C72 C71 C76 118.3(8) . . ? 
C72 C71 P4 119.9(7) . . ? 
C76 C71 P4 121.7(7) . . ? 
C71 C72 C73 121.9(9) . . ? 
C74 C73 C72 121.5(11) . . ? 
C73 C74 C75 117.7(11) . . ? 
C74 C75 C76 122.1(10) . . ? 
C71 C76 C75 118.5(10) . . ? 
C82 C81 C86 119.0(7) . . ? 
C82 C81 P4 119.5(6) . . ? 
C86 C81 P4 121.5(6) . . ? 
C81 C82 C83 119.9(8) . . ? 
C84 C83 C82 120.4(9) . . ? 
C85 C84 C83 120.3(9) . . ? 
C84 C85 C86 120.6(9) . . ? 
C81 C86 C85 119.8(8) . . ? 
F1 P5 F1 177.4(7) . 2_565 ? 
F1 P5 F3 91.2(4) . 2_565 ? 
F1 P5 F3 88.8(4) 2_565 2_565 ? 
F1 P5 F3 88.8(4) . . ? 
F1 P5 F3 91.2(4) 2_565 . ? 
F3 P5 F3 178.9(6) 2_565 . ? 
F1 P5 F4 76.6(5) . 2_565 ? 
F1 P5 F4 106.0(5) 2_565 2_565 ? 
F3 P5 F4 87.5(5) 2_565 2_565 ? 
F3 P5 F4 91.4(5) . 2_565 ? 
F1 P5 F4 106.0(5) . . ? 
F1 P5 F4 76.6(5) 2_565 . ? 
F3 P5 F4 91.4(5) 2_565 . ? 
F3 P5 F4 87.5(5) . . ? 
F4 P5 F4 29.8(8) 2_565 . ? 
F1 P5 F2 83.4(6) . . ? 
F1 P5 F2 94.1(7) 2_565 . ? 
F3 P5 F2 79.2(5) 2_565 . ? 
F3 P5 F2 101.9(5) . . ? 
F4 P5 F2 155.7(6) 2_565 . ? 
F4 P5 F2 166.9(7) . . ? 
F1 P5 F2 94.1(7) . 2_565 ? 
F1 P5 F2 83.4(6) 2_565 2_565 ? 
F3 P5 F2 101.9(5) 2_565 2_565 ? 
F3 P5 F2 79.2(5) . 2_565 ? 
F4 P5 F2 166.9(7) 2_565 2_565 ? 
F4 P5 F2 155.7(6) . 2_565 ? 
F2 P5 F2 25.4(8) . 2_565 ? 
F2 F2 P5 77.3(4) 2_565 . ? 
F4 F4 P5 75.1(4) 2_565 . ? 
F9 P6 F8' 78.1(6) . . ? 
F9 P6 F8' 78.1(6) . 6_455 ? 
F8' P6 F8' 156.2(11) . 6_455 ? 
F9 P6 F7 172.8(9) . . ? 
F8' P6 F7 106.5(13) . . ? 
F8' P6 F7 97.1(12) 6_455 . ? 
F9 P6 F7 172.8(9) . 6_455 ? 
F8' P6 F7 97.1(12) . 6_455 ? 
F8' P6 F7 106.5(13) 6_455 6_455 ? 
F7 P6 F7 14.4(19) . 6_455 ? 
F9 P6 F10 102.2(4) . 6_455 ? 
F8' P6 F10 95.0(6) . 6_455 ? 
F8' P6 F10 90.0(6) 6_455 6_455 ? 
F7 P6 F10 72.1(10) . 6_455 ? 
F7 P6 F10 83.5(11) 6_455 6_455 ? 
F9 P6 F10 102.2(4) . . ? 
F8' P6 F10 90.0(6) . . ? 
F8' P6 F10 95.0(6) 6_455 . ? 
F7 P6 F10 83.5(11) . . ? 
F7 P6 F10 72.1(10) 6_455 . ? 
F10 P6 F10 155.6(9) 6_455 . ? 
F9 P6 F10' 76.8(5) . 6_455 ? 
F8' P6 F10' 86.3(6) . 6_455 ? 
F8' P6 F10' 88.3(6) 6_455 6_455 ? 
F7 P6 F10' 97.8(11) . 6_455 ? 
F7 P6 F10' 108.5(12) 6_455 6_455 ? 
F10 P6 F10' 25.7(5) 6_455 6_455 ? 
F10 P6 F10' 176.2(7) . 6_455 ? 
F9 P6 F10' 76.8(5) . . ? 
F8' P6 F10' 88.3(6) . . ? 
F8' P6 F10' 86.3(6) 6_455 . ? 
F7 P6 F10' 108.5(12) . . ? 
F7 P6 F10' 97.8(11) 6_455 . ? 
F10 P6 F10' 176.2(7) 6_455 . ? 
F10 P6 F10' 25.7(5) . . ? 
F10' P6 F10' 153.6(9) 6_455 . ? 
F9 P6 F8 103.9(4) . . ? 
F8' P6 F8 26.0(6) . . ? 
F8' P6 F8 176.2(7) 6_455 . ? 
F7 P6 F8 80.5(12) . . ? 
F7 P6 F8 71.8(11) 6_455 . ? 
F10 P6 F8 86.5(5) 6_455 . ? 
F10 P6 F8 87.7(5) . . ? 
F10' P6 F8 89.0(5) 6_455 . ? 
F10' P6 F8 97.3(5) . . ? 
F9 P6 F8 103.9(4) . 6_455 ? 
F8' P6 F8 176.2(7) . 6_455 ? 
F8' P6 F8 26.0(6) 6_455 6_455 ? 
F7 P6 F8 71.8(11) . 6_455 ? 
F7 P6 F8 80.5(12) 6_455 6_455 ? 
F10 P6 F8 87.7(5) 6_455 6_455 ? 
F10 P6 F8 86.5(5) . 6_455 ? 
F10' P6 F8 97.3(5) 6_455 6_455 ? 
F10' P6 F8 89.0(5) . 6_455 ? 
F8 P6 F8 152.1(9) . 6_455 ? 
F7 F7 P6 82.8(9) 6_455 . ? 
F8' F8 P6 72.7(17) . . ? 
F10' F10 P6 77.8(13) . . ? 
F8 F8' P6 81.2(17) . . ? 
F10 F10' P6 76.5(13) . . ? 
O101 O100 O101 165.3(58) . 3_554 ? 
O100 O101 O101 7.3(29) . 3_554 ? 
  
_refine_diff_density_max    1.145 
_refine_diff_density_min   -0.642 
_refine_diff_density_rms    0.126 
 
data_bsir2pt 
  
_audit_creation_method            SHELXL 
_chemical_name_systematic 
; 
 ? 
; 
_chemical_name_common             ? 
_chemical_formula_moiety          ? 
_chemical_formula_structural      ? 
_chemical_formula_analytical      ? 
_chemical_formula_sum             'C56 H46 Cl2 Ir2 O5 P4 Pt' 
_chemical_formula_weight          1573.20 
_chemical_melting_point           ? 
_chemical_compound_source         ? 
  
loop_ 
 _atom_type_symbol 
 _atom_type_description 
 _atom_type_scat_dispersion_real 
 _atom_type_scat_dispersion_imag 
 _atom_type_scat_source 
 'C'  'C'   0.0033   0.0016 
 'International Tables Vol C Tables 4.2.6.8 and 6.1.1.4' 
 'H'  'H'   0.0000   0.0000 
 'International Tables Vol C Tables 4.2.6.8 and 6.1.1.4' 
 'O'  'O'   0.0106   0.0060 
 'International Tables Vol C Tables 4.2.6.8 and 6.1.1.4' 
 'P'  'P'   0.1023   0.0942 
 'International Tables Vol C Tables 4.2.6.8 and 6.1.1.4' 
 'Cl'  'Cl'   0.1484   0.1585 
 'International Tables Vol C Tables 4.2.6.8 and 6.1.1.4' 
 'Ir'  'Ir'  -1.4442   7.9887 
 'International Tables Vol C Tables 4.2.6.8 and 6.1.1.4' 
 'Pt'  'Pt'  -1.7033   8.3905 
 'International Tables Vol C Tables 4.2.6.8 and 6.1.1.4' 
  
_symmetry_cell_setting            Triclinic 
_symmetry_space_group_name_H-M    P-1 
  
loop_ 
 _symmetry_equiv_pos_as_xyz 
 'x, y, z' 
 '-x, -y, -z' 
  
_cell_length_a                    13.1864(3) 
_cell_length_b                    13.5273(6) 
_cell_length_c                    17.0829(6) 
_cell_angle_alpha                 76.184(2) 
_cell_angle_beta                  77.205(2) 
_cell_angle_gamma                 67.111(2) 
_cell_volume                      2697.7(2) 
_cell_formula_units_Z             2 
_cell_measurement_temperature     294(2) 
_cell_measurement_reflns_used     ? 
_cell_measurement_theta_min       ? 
_cell_measurement_theta_max       ? 
  
_exptl_crystal_description        ? 
_exptl_crystal_colour             ? 
_exptl_crystal_size_max           0.08 
_exptl_crystal_size_mid           0.05 
_exptl_crystal_size_min           0.04 
_exptl_crystal_density_meas       ? 
_exptl_crystal_density_diffrn     1.937 
_exptl_crystal_density_method     ? 
_exptl_crystal_F_000              1496 
_exptl_absorpt_coefficient_mu     7.772 
_exptl_absorpt_correction_type    empirical 
_exptl_absorpt_correction_T_min   0.4118 
_exptl_absorpt_correction_T_max   0.5415 
  
_exptl_special_details 
; 
 ? 
; 
  
_diffrn_ambient_temperature       294(2) 
_diffrn_radiation_wavelength      0.71073 
_diffrn_radiation_type            MoK\a 
_diffrn_radiation_source          'fine-focus sealed tube' 
_diffrn_radiation_monochromator   graphite 
_diffrn_measurement_device        'Kappa CCD' 
_diffrn_measurement_method        '\w scans, phi scans' 
_diffrn_standards_number          ? 
_diffrn_standards_interval_count  ? 
_diffrn_standards_interval_time   ? 
_diffrn_standards_decay_%         ? 
_diffrn_reflns_number             15004 
_diffrn_reflns_av_R_equivalents   0.0486 
_diffrn_reflns_av_sigmaI/netI     0.0835 
_diffrn_reflns_limit_h_min        -18 
_diffrn_reflns_limit_h_max        17 
_diffrn_reflns_limit_k_min        -16 
_diffrn_reflns_limit_k_max        19 
_diffrn_reflns_limit_l_min        -24 
_diffrn_reflns_limit_l_max        21 
_diffrn_reflns_theta_min          1.24 
_diffrn_reflns_theta_max          25.00 
_reflns_number_total              9376 
_reflns_number_observed           6849 
_reflns_observed_criterion        >2sigma(I) 
  
_computing_data_collection        'Nonius COLLECT' 
_computing_cell_refinement        'Nonius DENZO' 
_computing_data_reduction         'Nonius SCALEPACK' 
_computing_structure_solution     'SHELXS-86 (Sheldrick, 1990)' 
_computing_structure_refinement   'SHELXL-93 (Sheldrick, 1993)' 
_computing_molecular_graphics     'Siemens SHELXTL' 
_computing_publication_material   'Siemens SHELXTL' 
  
_refine_special_details 
; 
 Refinement on F^2^ for ALL reflections except for 635 with very negative
F^2^ 
 or flagged by the user for potential systematic errors.  Weighted R-factors 
 wR and all goodnesses of fit S are based on F^2^, conventional R-factors R 
 are based on F, with F set to zero for negative F^2^. The observed criterion 
 of F^2^ > 2sigma(F^2^) is used only for calculating _R_factor_obs etc. and
is 
 not relevant to the choice of reflections for refinement.  R-factors based 
 on F^2^ are statistically about twice as large as those based on F, and R- 
 factors based on ALL data will be even larger. 
; 
  
_refine_ls_structure_factor_coef  Fsqd 
_refine_ls_matrix_type            full 
_refine_ls_weighting_scheme 
 'calc w=1/[\s^2^(Fo^2^)+(0.0089P)^2^+0.0000P] where P=(Fo^2^+2Fc^2^)/3' 
_atom_sites_solution_primary      direct 
_atom_sites_solution_secondary    difmap 
_atom_sites_solution_hydrogens    geom 
_refine_ls_hydrogen_treatment     ? 
_refine_ls_extinction_method      SHELXL 
_refine_ls_extinction_coef        0.00004(4) 
_refine_ls_extinction_expression 
 'Fc^*^=kFc[1+0.001xFc^2^\l^3^/sin(2\q)]^-1/4^' 
_refine_ls_number_reflns          8741 
_refine_ls_number_parameters      632 
_refine_ls_number_restraints      0 
_refine_ls_R_factor_all           0.0641 
_refine_ls_R_factor_obs           0.0335 
_refine_ls_wR_factor_all          0.0763 
_refine_ls_wR_factor_obs          0.0616 
_refine_ls_goodness_of_fit_all    0.998 
_refine_ls_goodness_of_fit_obs    0.997 
_refine_ls_restrained_S_all       1.042 
_refine_ls_restrained_S_obs       0.997 
_refine_ls_shift/esd_max          0.008 
_refine_ls_shift/esd_mean         0.000 
  
loop_ 
 _atom_site_label 
 _atom_site_type_symbol 
 _atom_site_fract_x 
 _atom_site_fract_y 
 _atom_site_fract_z 
 _atom_site_U_iso_or_equiv 
 _atom_site_thermal_displace_type 
 _atom_site_occupancy 
 _atom_site_calc_flag 
 _atom_site_refinement_flags 
 _atom_site_disorder_group 
Pt1 Pt 0.92797(2) 0.61175(3) 0.76470(2) 0.03218(9) Uani 1 d . . 
Ir1 Ir 0.72058(2) 0.67331(2) 0.74009(2) 0.02704(9) Uani 1 d . . 
Ir2 Ir 0.87278(2) 0.49204(3) 0.68995(2) 0.03015(9) Uani 1 d . . 
P1 P 0.89786(13) 0.7602(2) 0.81938(12) 0.0328(5) Uani 1 d . . 
P2 P 0.65533(13) 0.7930(2) 0.83044(11) 0.0296(4) Uani 1 d . . 
P3 P 0.56446(13) 0.6521(2) 0.71669(11) 0.0311(5) Uani 1 d . . 
P4 P 0.74241(14) 0.4620(2) 0.63812(11) 0.0324(5) Uani 1 d . . 
O1 O 0.7513(4) 0.4588(4) 0.8631(3) 0.0415(13) Uani 1 d . . 
O2 O 1.1721(4) 0.4903(7) 0.7710(4) 0.098(3) Uani 1 d . . 
O3 O 0.7623(5) 0.8376(6) 0.5921(3) 0.080(2) Uani 1 d . . 
O4 O 1.0351(5) 0.2600(6) 0.7222(4) 0.077(2) Uani 1 d . . 
O5 O 0.9992(5) 0.5964(7) 0.5433(4) 0.087(2) Uani 1 d . . 
C1 C 0.7704(5) 0.5142(6) 0.8002(4) 0.030(2) Uani 1 d . . 
C2 C 1.0798(6) 0.5355(8) 0.7671(5) 0.054(3) Uani 1 d . . 
C3 C 0.7427(6) 0.7797(7) 0.6481(5) 0.042(2) Uani 1 d . . 
C4 C 0.9737(6) 0.3490(8) 0.7111(5) 0.047(2) Uani 1 d . . 
C5 C 0.9488(6) 0.5573(7) 0.5958(5) 0.048(2) Uani 1 d . . 
C6 C 0.7565(4) 0.8623(7) 0.8141(4) 0.036(2) Uani 1 d . . 
H6A H 0.7539(4) 0.9091(7) 0.7613(4) 0.043 Uiso 1 calc R . 
H6B H 0.7374(4) 0.9074(7) 0.8555(4) 0.043 Uiso 1 calc R . 
C7 C 0.6040(5) 0.5123(6) 0.6994(4) 0.036(2) Uani 1 d . . 
H7A H 0.5487(5) 0.5092(6) 0.6718(4) 0.044 Uiso 1 calc R . 
H7B H 0.6037(5) 0.4644(6) 0.7516(4) 0.044 Uiso 1 calc R . 
C11 C 0.9202(5) 0.7346(7) 0.9257(4) 0.035(2) Uani 1 d . . 
C12 C 0.8650(6) 0.8071(8) 0.9788(5) 0.053(2) Uani 1 d . . 
H12A H 0.8101(6) 0.8727(8) 0.9620(5) 0.064 Uiso 1 calc R . 
C13 C 0.8905(7) 0.7831(9) 1.0566(6) 0.074(3) Uani 1 d . . 
H13A H 0.8537(7) 0.8331(9) 1.0918(6) 0.089 Uiso 1 calc R . 
C14 C 0.9698(7) 0.6860(9) 1.0823(5) 0.064(3) Uani 1 d . . 
H14A H 0.9852(7) 0.6690(9) 1.1355(5) 0.077 Uiso 1 calc R . 
C15 C 1.0256(6) 0.6147(8) 1.0303(5) 0.055(2) Uani 1 d . . 
H15A H 1.0810(6) 0.5497(8) 1.0474(5) 0.066 Uiso 1 calc R . 
C16 C 1.0009(6) 0.6379(7) 0.9519(5) 0.046(2) Uani 1 d . . 
H16A H 1.0390(6) 0.5880(7) 0.9167(5) 0.055 Uiso 1 calc R . 
C21 C 0.9848(5) 0.8404(7) 0.7643(5) 0.041(2) Uani 1 d . . 
C22 C 0.9924(6) 0.9212(7) 0.7964(6) 0.054(2) Uani 1 d . . 
H22A H 0.9523(6) 0.9367(7) 0.8468(6) 0.065 Uiso 1 calc R . 
C23 C 1.0597(7) 0.9796(8) 0.7535(7) 0.072(3) Uani 1 d . . 
H23A H 1.0651(7) 1.0336(8) 0.7756(7) 0.087 Uiso 1 calc R . 
C24 C 1.1173(7) 0.9582(10) 0.6797(7) 0.079(4) Uani 1 d . . 
H24A H 1.1621(7) 0.9978(10) 0.6513(7) 0.095 Uiso 1 calc R . 
C25 C 1.1107(7) 0.8801(9) 0.6466(6) 0.076(3) Uani 1 d . . 
H25A H 1.1510(7) 0.8663(9) 0.5959(6) 0.091 Uiso 1 calc R . 
C26 C 1.0434(6) 0.8194(8) 0.6883(5) 0.057(3) Uani 1 d . . 
H26A H 1.0383(6) 0.7661(8) 0.6652(5) 0.069 Uiso 1 calc R . 
C31 C 0.5262(5) 0.9071(6) 0.8109(4) 0.032(2) Uani 1 d . . 
C32 C 0.4238(5) 0.9016(7) 0.8520(4) 0.043(2) Uani 1 d . . 
H32A H 0.4211(5) 0.8446(7) 0.8945(4) 0.051 Uiso 1 calc R . 
C33 C 0.3263(6) 0.9820(8) 0.8289(6) 0.059(3) Uani 1 d . . 
H33A H 0.2585(6) 0.9770(8) 0.8556(6) 0.071 Uiso 1 calc R . 
C34 C 0.3271(6) 1.0681(8) 0.7683(5) 0.058(3) Uani 1 d . . 
H34A H 0.2605(6) 1.1215(8) 0.7544(5) 0.070 Uiso 1 calc R . 
C35 C 0.4287(6) 1.0754(7) 0.7271(5) 0.054(2) Uani 1 d . . 
H35A H 0.4308(6) 1.1339(7) 0.6858(5) 0.065 Uiso 1 calc R . 
C36 C 0.5261(6) 0.9944(7) 0.7486(5) 0.043(2) Uani 1 d . . 
H36A H 0.5937(6) 0.9984(7) 0.7205(5) 0.052 Uiso 1 calc R . 
C41 C 0.6379(5) 0.7581(7) 0.9410(4) 0.036(2) Uani 1 d . . 
C42 C 0.5913(5) 0.8392(8) 0.9892(5) 0.050(2) Uani 1 d . . 
H42A H 0.5628(5) 0.9116(8) 0.9644(5) 0.060 Uiso 1 calc R . 
C43 C 0.5865(7) 0.8151(9) 1.0726(5) 0.064(3) Uani 1 d . . 
H43A H 0.5550(7) 0.8702(9) 1.1039(5) 0.076 Uiso 1 calc R . 
C44 C 0.6285(7) 0.7093(9) 1.1083(5) 0.063(3) Uani 1 d . . 
H44A H 0.6265(7) 0.6928(9) 1.1646(5) 0.075 Uiso 1 calc R . 
C45 C 0.6744(7) 0.6248(8) 1.0633(5) 0.064(3) Uani 1 d . . 
H45A H 0.7024(7) 0.5526(8) 1.0885(5) 0.076 Uiso 1 calc R . 
C46 C 0.6771(5) 0.6522(7) 0.9788(5) 0.043(2) Uani 1 d . . 
H46A H 0.7062(5) 0.5970(7) 0.9476(5) 0.051 Uiso 1 calc R . 
C51 C 0.4937(5) 0.7413(7) 0.6313(4) 0.036(2) Uani 1 d . . 
C52 C 0.4579(5) 0.7068(8) 0.5751(5) 0.050(2) Uani 1 d . . 
H52A H 0.4713(5) 0.6331(8) 0.5791(5) 0.060 Uiso 1 calc R . 
C53 C 0.4036(6) 0.7797(8) 0.5144(5) 0.060(3) Uani 1 d . . 
H53A H 0.3809(6) 0.7549(8) 0.4774(5) 0.072 Uiso 1 calc R . 
C54 C 0.3819(6) 0.8883(8) 0.5068(5) 0.059(3) Uani 1 d . . 
H54A H 0.3443(6) 0.9374(8) 0.4653(5) 0.071 Uiso 1 calc R . 
C55 C 0.4160(6) 0.9237(7) 0.5607(5) 0.054(2) Uani 1 d . . 
H55A H 0.4018(6) 0.9977(7) 0.5559(5) 0.064 Uiso 1 calc R . 
C56 C 0.4709(6) 0.8518(7) 0.6221(5) 0.051(2) Uani 1 d . . 
H56A H 0.4935(6) 0.8778(7) 0.6584(5) 0.061 Uiso 1 calc R . 
C61 C 0.4488(5) 0.6559(6) 0.8009(4) 0.032(2) Uani 1 d . . 
C62 C 0.3390(5) 0.7001(8) 0.7885(5) 0.056(3) Uani 1 d . . 
H62A H 0.3201(5) 0.7283(8) 0.7362(5) 0.067 Uiso 1 calc R . 
C63 C 0.2571(6) 0.7013(8) 0.8557(5) 0.064(3) Uani 1 d . . 
H63A H 0.1827(6) 0.7299(8) 0.8481(5) 0.077 Uiso 1 calc R . 
C64 C 0.2837(6) 0.6616(8) 0.9323(5) 0.060(3) Uani 1 d . . 
H64A H 0.2274(6) 0.6642(8) 0.9764(5) 0.073 Uiso 1 calc R . 
C65 C 0.3920(5) 0.6178(7) 0.9452(5) 0.050(2) Uani 1 d . . 
H65A H 0.4102(5) 0.5901(7) 0.9976(5) 0.060 Uiso 1 calc R . 
C66 C 0.4746(5) 0.6157(7) 0.8783(4) 0.043(2) Uani 1 d . . 
H66A H 0.5488(5) 0.5863(7) 0.8863(4) 0.052 Uiso 1 calc R . 
C71 C 0.7171(5) 0.5265(7) 0.5335(4) 0.039(2) Uani 1 d . . 
C72 C 0.6770(7) 0.4832(8) 0.4875(5) 0.064(3) Uani 1 d . . 
H72A H 0.6632(7) 0.4190(8) 0.5093(5) 0.076 Uiso 1 calc R . 
C73 C 0.6567(8) 0.5347(9) 0.4085(6) 0.082(3) Uani 1 d . . 
H73A H 0.6296(8) 0.5047(9) 0.3777(6) 0.099 Uiso 1 calc R . 
C74 C 0.6767(7) 0.6293(9) 0.3763(5) 0.069(3) Uani 1 d . . 
H74A H 0.6611(7) 0.6652(9) 0.3243(5) 0.083 Uiso 1 calc R . 
C75 C 0.7196(6) 0.6704(8) 0.4212(5) 0.060(2) Uani 1 d . . 
H75A H 0.7364(6) 0.7329(8) 0.3987(5) 0.072 Uiso 1 calc R . 
C76 C 0.7380(6) 0.6205(7) 0.4990(4) 0.045(2) Uani 1 d . . 
H76A H 0.7653(6) 0.6509(7) 0.5292(4) 0.054 Uiso 1 calc R . 
C81 C 0.7639(6) 0.3208(7) 0.6386(5) 0.039(2) Uani 1 d . . 
C82 C 0.8546(7) 0.2616(8) 0.5903(5) 0.059(3) Uani 1 d . . 
H82A H 0.9023(7) 0.2956(8) 0.5577(5) 0.071 Uiso 1 calc R . 
C83 C 0.8772(7) 0.1542(8) 0.5886(6) 0.067(3) Uani 1 d . . 
H83A H 0.9380(7) 0.1175(8) 0.5537(6) 0.080 Uiso 1 calc R . 
C84 C 0.8111(8) 0.1005(8) 0.6379(6) 0.065(3) Uani 1 d . . 
H84A H 0.8275(8) 0.0269(8) 0.6388(6) 0.078 Uiso 1 calc R . 
C85 C 0.7201(8) 0.1590(8) 0.6857(6) 0.070(3) Uani 1 d . . 
H85A H 0.6725(8) 0.1250(8) 0.7183(6) 0.085 Uiso 1 calc R . 
C86 C 0.6975(6) 0.2659(7) 0.6869(5) 0.054(2) Uani 1 d . . 
H86A H 0.6357(6) 0.3026(7) 0.7211(5) 0.065 Uiso 1 calc R . 
C10 C 0.1945(7) 0.8100(9) 1.1167(6) 0.087(3) Uani 1 d . . 
H10A H 0.1620(7) 0.8271(9) 1.1708(6) 0.105 Uiso 1 calc R . 
H10B H 0.2031(7) 0.7352(9) 1.1175(6) 0.105 Uiso 1 calc R . 
Cl1 Cl 0.1056(3) 0.8965(3) 1.0469(2) 0.1308(13) Uani 1 d . . 
Cl2 Cl 0.3214(2) 0.8229(4) 1.0920(2) 0.145(2) Uani 1 d . . 
  
loop_ 
 _atom_site_aniso_label 
 _atom_site_aniso_U_11 
 _atom_site_aniso_U_22 
 _atom_site_aniso_U_33 
 _atom_site_aniso_U_23 
 _atom_site_aniso_U_13 
 _atom_site_aniso_U_12 
Pt1 0.02736(14) 0.0319(2) 0.0382(2) -0.00801(15) -0.00895(11) -0.00802(13) 
Ir1 0.02659(14) 0.0253(2) 0.0291(2) -0.00159(13) -0.00734(11) -0.00905(12) 
Ir2 0.03068(15) 0.0289(2) 0.0314(2) -0.00646(14) -0.00490(11) -0.01013(13) 
P1 0.0291(9) 0.0312(13) 0.0402(11) -0.0046(10) -0.0106(8) -0.0106(9) 
P2 0.0274(9) 0.0251(12) 0.0348(11) -0.0032(9) -0.0078(7) -0.0072(8) 
P3 0.0305(9) 0.0318(13) 0.0314(11) 0.0009(9) -0.0085(8) -0.0131(9) 
P4 0.0405(10) 0.0286(12) 0.0303(11) -0.0008(9) -0.0088(8) -0.0151(9) 
O1 0.051(3) 0.030(3) 0.036(3) 0.006(3) -0.005(2) -0.015(3) 
O2 0.035(3) 0.132(8) 0.109(6) -0.045(6) -0.022(3) 0.010(4) 
O3 0.114(5) 0.081(6) 0.042(4) 0.024(4) -0.004(3) -0.057(5) 
O4 0.091(4) 0.041(5) 0.083(5) -0.015(4) -0.035(4) 0.008(4) 
O5 0.099(5) 0.110(7) 0.069(5) -0.025(5) 0.027(4) -0.071(5) 
C1 0.031(4) 0.028(5) 0.030(4) -0.003(4) -0.011(3) -0.006(3) 
C2 0.042(4) 0.067(7) 0.054(6) -0.031(5) -0.005(4) -0.010(5) 
C3 0.046(4) 0.038(6) 0.040(5) -0.014(4) -0.007(4) -0.007(4) 
C4 0.047(5) 0.057(7) 0.039(5) -0.016(5) -0.008(4) -0.018(5) 
C5 0.058(5) 0.048(6) 0.042(5) -0.012(5) 0.002(4) -0.025(5) 
C6 0.031(3) 0.049(6) 0.033(4) -0.001(4) -0.013(3) -0.018(4) 
C7 0.046(4) 0.032(5) 0.038(4) 0.005(4) -0.010(3) -0.026(4) 
C11 0.032(4) 0.035(5) 0.041(5) -0.006(4) -0.011(3) -0.014(4) 
C12 0.052(5) 0.053(7) 0.057(6) -0.021(5) -0.017(4) -0.008(5) 
C13 0.073(6) 0.086(9) 0.064(7) -0.038(7) -0.019(5) -0.008(6) 
C14 0.082(6) 0.076(8) 0.038(5) -0.002(6) -0.022(5) -0.028(6) 
C15 0.055(5) 0.046(6) 0.065(6) 0.005(5) -0.030(4) -0.016(5) 
C16 0.052(4) 0.045(6) 0.042(5) -0.002(4) -0.021(4) -0.016(4) 
C21 0.031(4) 0.041(6) 0.052(5) 0.003(4) -0.015(3) -0.014(4) 
C22 0.058(5) 0.039(6) 0.078(7) -0.003(5) -0.017(4) -0.031(5) 
C23 0.064(6) 0.042(6) 0.124(10) 0.006(7) -0.031(6) -0.035(5) 
C24 0.056(6) 0.084(10) 0.092(9) 0.029(7) -0.013(5) -0.044(6) 
C25 0.062(6) 0.068(9) 0.085(8) 0.004(7) 0.008(5) -0.031(6) 
C26 0.052(5) 0.064(7) 0.054(6) -0.005(5) -0.002(4) -0.026(5) 
C31 0.034(4) 0.025(5) 0.038(4) -0.006(4) -0.009(3) -0.009(3) 
C32 0.040(4) 0.039(5) 0.043(5) -0.006(4) -0.003(3) -0.010(4) 
C33 0.035(4) 0.059(7) 0.074(7) -0.021(6) -0.012(4) 0.003(5) 
C34 0.041(5) 0.047(7) 0.074(7) -0.014(6) -0.023(4) 0.009(4) 
C35 0.047(5) 0.043(6) 0.063(6) 0.005(5) -0.029(4) -0.005(4) 
C36 0.038(4) 0.029(5) 0.056(5) -0.003(4) -0.012(4) -0.005(4) 
C41 0.024(3) 0.045(6) 0.039(4) -0.008(4) -0.008(3) -0.008(4) 
C42 0.052(5) 0.051(7) 0.042(5) -0.007(5) -0.014(4) -0.009(5) 
C43 0.066(6) 0.068(8) 0.054(6) -0.017(6) -0.013(5) -0.013(6) 
C44 0.082(6) 0.073(8) 0.035(5) -0.010(6) -0.010(4) -0.026(6) 
C45 0.091(6) 0.046(7) 0.048(6) 0.004(5) -0.030(5) -0.014(6) 
C46 0.046(4) 0.034(5) 0.045(5) -0.007(4) -0.012(4) -0.007(4) 
C51 0.034(4) 0.037(5) 0.034(4) 0.004(4) -0.006(3) -0.015(4) 
C52 0.055(5) 0.044(6) 0.053(5) -0.006(5) -0.028(4) -0.010(4) 
C53 0.070(5) 0.062(8) 0.053(6) 0.004(5) -0.039(4) -0.021(6) 
C54 0.061(5) 0.058(7) 0.052(6) 0.019(5) -0.035(4) -0.016(5) 
C55 0.059(5) 0.030(5) 0.068(6) 0.006(5) -0.024(4) -0.012(4) 
C56 0.061(5) 0.039(6) 0.053(6) 0.004(5) -0.028(4) -0.015(5) 
C61 0.034(4) 0.026(5) 0.038(4) 0.006(4) -0.007(3) -0.018(3) 
C62 0.032(4) 0.079(8) 0.045(5) 0.006(5) -0.012(3) -0.012(5) 
C63 0.028(4) 0.072(8) 0.074(7) 0.008(6) -0.011(4) -0.009(4) 
C64 0.032(4) 0.074(8) 0.061(6) -0.004(6) 0.004(4) -0.014(5) 
C65 0.047(4) 0.055(6) 0.036(5) 0.012(4) -0.006(4) -0.017(4) 
C66 0.032(4) 0.046(6) 0.049(5) -0.001(5) -0.006(3) -0.017(4) 
C71 0.048(4) 0.033(5) 0.035(4) 0.000(4) -0.004(3) -0.019(4) 
C72 0.107(7) 0.054(7) 0.045(6) 0.010(5) -0.032(5) -0.044(6) 
C73 0.144(9) 0.056(8) 0.061(7) -0.004(6) -0.050(6) -0.035(8) 
C74 0.112(7) 0.058(8) 0.031(5) -0.003(5) -0.037(5) -0.010(6) 
C75 0.083(6) 0.042(6) 0.044(6) 0.016(5) -0.016(5) -0.023(5) 
C76 0.057(5) 0.047(6) 0.033(5) 0.004(4) -0.014(4) -0.023(5) 
C81 0.048(4) 0.032(5) 0.042(5) 0.003(4) -0.022(4) -0.016(4) 
C82 0.066(6) 0.054(7) 0.062(6) -0.016(6) 0.004(5) -0.029(5) 
C83 0.085(6) 0.041(7) 0.069(7) -0.027(6) -0.013(5) -0.004(6) 
C84 0.106(8) 0.023(6) 0.071(7) 0.013(5) -0.040(6) -0.026(6) 
C85 0.091(7) 0.046(7) 0.088(8) -0.004(6) -0.012(6) -0.043(6) 
C86 0.064(5) 0.036(6) 0.068(6) -0.011(5) -0.010(4) -0.023(5) 
C10 0.080(7) 0.064(8) 0.110(9) -0.015(7) -0.010(6) -0.019(6) 
Cl1 0.143(3) 0.085(3) 0.166(4) -0.034(3) -0.066(2) -0.011(2) 
Cl2 0.106(2) 0.249(6) 0.105(3) -0.051(3) 0.007(2) -0.089(3) 
  
_geom_special_details 
; 
 All esds (except the esd in the dihedral angle between two l.s. planes) 
 are estimated using the full covariance matrix.  The cell esds are taken 
 into account individually in the estimation of esds in distances, angles 
 and torsion angles; correlations between esds in cell parameters are only 
 used when they are defined by crystal symmetry.  An approximate (isotropic) 
 treatment of cell esds is used for estimating esds involving l.s. planes. 
; 
  
loop_ 
 _geom_bond_atom_site_label_1 
 _geom_bond_atom_site_label_2 
 _geom_bond_distance 
 _geom_bond_site_symmetry_2 
 _geom_bond_publ_flag 
Pt1 C2 1.866(7) . ? 
Pt1 P1 2.275(2) . ? 
Pt1 Ir1 2.6305(3) . ? 
Pt1 Ir2 2.6642(4) . ? 
Ir1 C3 1.915(9) . ? 
Ir1 C1 2.065(8) . ? 
Ir1 P2 2.295(2) . ? 
Ir1 P3 2.315(2) . ? 
Ir1 Ir2 2.6810(4) . ? 
Ir2 C4 1.877(9) . ? 
Ir2 C5 1.915(8) . ? 
Ir2 C1 2.071(6) . ? 
Ir2 P4 2.301(2) . ? 
P1 C11 1.834(7) . ? 
P1 C21 1.838(8) . ? 
P1 C6 1.845(6) . ? 
P2 C41 1.820(7) . ? 
P2 C31 1.831(7) . ? 
P2 C6 1.849(6) . ? 
P3 C51 1.828(7) . ? 
P3 C7 1.835(7) . ? 
P3 C61 1.843(6) . ? 
P4 C81 1.818(8) . ? 
P4 C71 1.832(8) . ? 
P4 C7 1.849(6) . ? 
O1 C1 1.192(8) . ? 
O2 C2 1.140(8) . ? 
O3 C3 1.135(9) . ? 
O4 C4 1.158(10) . ? 
O5 C5 1.144(8) . ? 
C11 C12 1.375(10) . ? 
C11 C16 1.375(10) . ? 
C12 C13 1.375(11) . ? 
C13 C14 1.368(13) . ? 
C14 C15 1.351(11) . ? 
C15 C16 1.384(10) . ? 
C21 C22 1.378(11) . ? 
C21 C26 1.389(10) . ? 
C22 C23 1.388(10) . ? 
C23 C24 1.354(12) . ? 
C24 C25 1.349(14) . ? 
C25 C26 1.405(11) . ? 
C31 C36 1.387(10) . ? 
C31 C32 1.399(8) . ? 
C32 C33 1.386(10) . ? 
C33 C34 1.363(12) . ? 
C34 C35 1.398(10) . ? 
C35 C36 1.381(9) . ? 
C41 C46 1.366(11) . ? 
C41 C42 1.395(10) . ? 
C42 C43 1.375(10) . ? 
C43 C44 1.357(13) . ? 
C44 C45 1.394(12) . ? 
C45 C46 1.397(10) . ? 
C51 C56 1.382(11) . ? 
C51 C52 1.395(10) . ? 
C52 C53 1.360(11) . ? 
C53 C54 1.362(13) . ? 
C54 C55 1.357(11) . ? 
C55 C56 1.369(10) . ? 
C61 C66 1.368(9) . ? 
C61 C62 1.380(8) . ? 
C62 C63 1.390(9) . ? 
C63 C64 1.358(11) . ? 
C64 C65 1.363(9) . ? 
C65 C66 1.391(8) . ? 
C71 C76 1.372(11) . ? 
C71 C72 1.373(10) . ? 
C72 C73 1.395(12) . ? 
C73 C74 1.368(13) . ? 
C74 C75 1.363(11) . ? 
C75 C76 1.367(10) . ? 
C81 C86 1.375(10) . ? 
C81 C82 1.373(10) . ? 
C82 C83 1.372(12) . ? 
C83 C84 1.368(12) . ? 
C84 C85 1.368(11) . ? 
C85 C86 1.362(12) . ? 
C10 Cl2 1.699(8) . ? 
C10 Cl1 1.746(10) . ? 
  
loop_ 
 _geom_angle_atom_site_label_1 
 _geom_angle_atom_site_label_2 
 _geom_angle_atom_site_label_3 
 _geom_angle 
 _geom_angle_site_symmetry_1 
 _geom_angle_site_symmetry_3 
 _geom_angle_publ_flag 
C2 Pt1 P1 102.3(3) . . ? 
C2 Pt1 Ir1 163.4(3) . . ? 
P1 Pt1 Ir1 94.26(4) . . ? 
C2 Pt1 Ir2 102.6(3) . . ? 
P1 Pt1 Ir2 154.85(4) . . ? 
Ir1 Pt1 Ir2 60.837(11) . . ? 
C3 Ir1 C1 149.2(3) . . ? 
C3 Ir1 P2 94.2(2) . . ? 
C1 Ir1 P2 111.0(2) . . ? 
C3 Ir1 P3 101.9(2) . . ? 
C1 Ir1 P3 88.6(2) . . ? 
P2 Ir1 P3 105.27(6) . . ? 
C3 Ir1 Pt1 91.0(2) . . ? 
C1 Ir1 Pt1 70.9(2) . . ? 
P2 Ir1 Pt1 93.24(4) . . ? 
P3 Ir1 Pt1 156.40(5) . . ? 
C3 Ir1 Ir2 99.9(2) . . ? 
C1 Ir1 Ir2 49.7(2) . . ? 
P2 Ir1 Ir2 149.86(5) . . ? 
P3 Ir1 Ir2 97.78(5) . . ? 
Pt1 Ir1 Ir2 60.203(10) . . ? 
C4 Ir2 C5 103.3(3) . . ? 
C4 Ir2 C1 103.7(3) . . ? 
C5 Ir2 C1 145.9(3) . . ? 
C4 Ir2 P4 100.2(2) . . ? 
C5 Ir2 P4 103.4(2) . . ? 
C1 Ir2 P4 91.9(2) . . ? 
C4 Ir2 Pt1 106.6(2) . . ? 
C5 Ir2 Pt1 82.6(2) . . ? 
C1 Ir2 Pt1 70.0(2) . . ? 
P4 Ir2 Pt1 150.45(5) . . ? 
C4 Ir2 Ir1 151.4(2) . . ? 
C5 Ir2 Ir1 99.1(3) . . ? 
C1 Ir2 Ir1 49.5(2) . . ? 
P4 Ir2 Ir1 91.49(5) . . ? 
Pt1 Ir2 Ir1 58.960(10) . . ? 
C11 P1 C21 104.2(3) . . ? 
C11 P1 C6 106.0(3) . . ? 
C21 P1 C6 101.8(3) . . ? 
C11 P1 Pt1 116.5(3) . . ? 
C21 P1 Pt1 113.8(3) . . ? 
C6 P1 Pt1 113.1(2) . . ? 
C41 P2 C31 103.1(3) . . ? 
C41 P2 C6 99.9(3) . . ? 
C31 P2 C6 102.3(3) . . ? 
C41 P2 Ir1 126.4(3) . . ? 
C31 P2 Ir1 115.0(2) . . ? 
C6 P2 Ir1 106.6(2) . . ? 
C51 P3 C7 106.2(3) . . ? 
C51 P3 C61 103.0(3) . . ? 
C7 P3 C61 99.8(3) . . ? 
C51 P3 Ir1 118.6(2) . . ? 
C7 P3 Ir1 108.3(2) . . ? 
C61 P3 Ir1 118.7(2) . . ? 
C81 P4 C71 102.6(4) . . ? 
C81 P4 C7 103.6(3) . . ? 
C71 P4 C7 103.7(3) . . ? 
C81 P4 Ir2 116.4(2) . . ? 
C71 P4 Ir2 118.4(2) . . ? 
C7 P4 Ir2 110.4(2) . . ? 
O1 C1 Ir1 141.7(5) . . ? 
O1 C1 Ir2 137.4(6) . . ? 
Ir1 C1 Ir2 80.8(3) . . ? 
O2 C2 Pt1 177.6(7) . . ? 
O3 C3 Ir1 175.5(7) . . ? 
O4 C4 Ir2 177.9(7) . . ? 
O5 C5 Ir2 174.9(7) . . ? 
P1 C6 P2 109.8(4) . . ? 
P3 C7 P4 113.4(3) . . ? 
C12 C11 C16 118.9(7) . . ? 
C12 C11 P1 124.3(6) . . ? 
C16 C11 P1 116.8(6) . . ? 
C13 C12 C11 120.4(8) . . ? 
C14 C13 C12 120.2(9) . . ? 
C15 C14 C13 119.9(9) . . ? 
C14 C15 C16 120.5(8) . . ? 
C11 C16 C15 120.1(8) . . ? 
C22 C21 C26 119.3(8) . . ? 
C22 C21 P1 121.7(6) . . ? 
C26 C21 P1 119.0(7) . . ? 
C21 C22 C23 120.3(8) . . ? 
C24 C23 C22 120.1(10) . . ? 
C25 C24 C23 120.8(10) . . ? 
C24 C25 C26 120.6(9) . . ? 
C21 C26 C25 118.9(9) . . ? 
C36 C31 C32 118.2(7) . . ? 
C36 C31 P2 121.1(5) . . ? 
C32 C31 P2 120.2(6) . . ? 
C33 C32 C31 119.4(8) . . ? 
C34 C33 C32 122.0(8) . . ? 
C33 C34 C35 119.4(8) . . ? 
C36 C35 C34 118.9(8) . . ? 
C35 C36 C31 122.1(7) . . ? 
C46 C41 C42 118.3(7) . . ? 
C46 C41 P2 120.9(6) . . ? 
C42 C41 P2 120.7(7) . . ? 
C43 C42 C41 121.7(9) . . ? 
C44 C43 C42 118.8(9) . . ? 
C43 C44 C45 121.9(9) . . ? 
C44 C45 C46 117.8(9) . . ? 
C41 C46 C45 121.5(8) . . ? 
C56 C51 C52 116.8(8) . . ? 
C56 C51 P3 118.2(6) . . ? 
C52 C51 P3 125.0(7) . . ? 
C53 C52 C51 120.8(9) . . ? 
C52 C53 C54 121.3(9) . . ? 
C55 C54 C53 119.0(9) . . ? 
C54 C55 C56 120.7(9) . . ? 
C55 C56 C51 121.4(8) . . ? 
C66 C61 C62 119.8(6) . . ? 
C66 C61 P3 117.8(5) . . ? 
C62 C61 P3 122.4(6) . . ? 
C61 C62 C63 118.5(7) . . ? 
C64 C63 C62 121.2(7) . . ? 
C63 C64 C65 120.8(7) . . ? 
C64 C65 C66 118.5(7) . . ? 
C61 C66 C65 121.3(6) . . ? 
C76 C71 C72 118.1(8) . . ? 
C76 C71 P4 120.3(6) . . ? 
C72 C71 P4 121.7(7) . . ? 
C71 C72 C73 120.6(9) . . ? 
C74 C73 C72 119.8(9) . . ? 
C75 C74 C73 119.4(9) . . ? 
C74 C75 C76 120.5(9) . . ? 
C75 C76 C71 121.5(8) . . ? 
C86 C81 C82 116.4(8) . . ? 
C86 C81 P4 124.6(6) . . ? 
C82 C81 P4 119.0(6) . . ? 
C83 C82 C81 122.2(9) . . ? 
C84 C83 C82 120.5(9) . . ? 
C85 C84 C83 117.5(9) . . ? 
C84 C85 C86 121.7(9) . . ? 
C85 C86 C81 121.5(8) . . ? 
Cl2 C10 Cl1 111.2(6) . . ? 
  
_refine_diff_density_max    2.171 
_refine_diff_density_min   -1.160 
_refine_diff_density_rms    0.201 
